# Supplementary material for: Sigma factor RpoS positively affects the spoilage activity of Shewanella baltica and negatively regulates its adhesion effect
Source: Front Microbiol. 2022 Sep 2;13:993237. doi: 10.3389/fmicb.2022.993237 (PMC9478337; doi:10.3389/fmicb.2022.993237)
Supplement: Supplementary file 5 [file Table_5.XLS]

## Sheet: Sheet1
Supplementary Table S5. Detailed data related to the 397 DEGs between the rpoS mutant and the S.baltica wild-type strain.
gene_id	rpoS_A	rpoS_B	rpoS_C	She_A	She_B	She_C	rpoS	She	log2FoldChange	pvalue	padj	gene_name	gene_chr	gene_start	gene_end	gene_strand	gene_length	gene_biotype	gene_description	tf_family
SBAL678_RS39925	13.7912	8.68348	12.0527	479.429	293.248	418.478	11.5091	397.052	-5.10103	4.64867e-44	1.73581e-40	rpoS	NC_999999999.1	3801209	3802189	-	981	protein_coding	RNA polymerase sigma factor RpoS && PF04539:Sigma-70 region 3|PF04542:Sigma-70 region 2|PF04545:Sigma-70, region 4|PF00140:Sigma-70 factor, region 1.2	Sigma70_r3
SBAL678_RS37220	5048.58	3161.87	4999.86	768.151	834.629	723.783	4403.44	775.521	2.5055	1.35186e-24	2.52392e-21	-	NC_999999999.1	3221586	3223322	-	1737	protein_coding	cation acetate symporter && PF00474:Sodium:solute symporter family	-
SBAL678_RS38365	3504.95	1881.06	3069.42	479.429	622.212	551.829	2818.48	551.157	2.35422	4.94797e-18	6.15858e-15	-	NC_999999999.1	3475308	3477266	-	1959	protein_coding	propionyl-CoA synthetase && PF00501:AMP-binding enzyme|PF16177:Acetyl-coenzyme A synthetase N-terminus|PF13193:AMP-binding enzyme C-terminal domain	AMP-binding
SBAL678_RS37225	853.087	441.772	798.491	91.6241	145.684	117.56	697.784	118.289	2.55925	8.03499e-17	6.9344e-14	-	NC_999999999.1	3223334	3223600	-	267	protein_coding	DUF4212 domain-containing protein && PF13937:Domain of unknown function (DUF4212)	-
SBAL678_RS34245	6010.03	3838.1	6296.53	1133.58	1397.63	1304.56	5381.55	1278.59	2.07339	9.28549e-17	6.9344e-14	-	NC_999999999.1	2539563	2541842	+	2280	protein_coding	acyl-CoA dehydrogenase && PF02771:Acyl-CoA dehydrogenase, N-terminal domain|PF09317:Domain of unknown function (DUF1974)|PF02770:Acyl-CoA dehydrogenase, middle domain|PF00441:Acyl-CoA dehydrogenase, C-terminal domain	-
SBAL678_RS33690	26520.6	14936.7	28133	3399.68	5512.5	5058.58	23196.8	4656.92	2.31642	5.95533e-15	3.7062e-12	-	NC_999999999.1	2418806	2421253	-	2448	protein_coding	acyl-CoA dehydrogenase && PF09317:Domain of unknown function (DUF1974)|PF00441:Acyl-CoA dehydrogenase, C-terminal domain|PF02771:Acyl-CoA dehydrogenase, N-terminal domain	-
SBAL678_RS32515	9132.76	5970.98	8577.5	1810.11	2451.25	2246.8	7893.75	2169.39	1.86334	2.07525e-14	1.107e-11	acs	NC_999999999.1	2147491	2149443	-	1953	protein_coding	acetate--CoA ligase && PF13193:AMP-binding enzyme C-terminal domain|PF16177:Acetyl-coenzyme A synthetase N-terminus|PF00501:AMP-binding enzyme	AMP-binding
SBAL678_RS23645	110.33	52.1009	65.2855	383.543	303.587	467.607	75.9054	384.912	-2.33974	1.37319e-13	6.40938e-11	-	NC_999999999.1	70284	71528	+	1245	protein_coding	MFS transporter && PF07690:Major Facilitator Superfamily	MFS_1
SBAL678_RS37035	4315.68	4028.05	5652.72	1125.06	1548.95	1527.4	4665.48	1400.47	1.73588	2.69939e-13	1.11995e-10	-	NC_999999999.1	3176509	3178221	-	1713	protein_coding	AMP-binding protein && PF13193:AMP-binding enzyme C-terminal domain|PF00501:AMP-binding enzyme	AMP-binding
SBAL678_RS43760	637.353	526.436	649.841	152.352	188.919	217.573	604.543	186.282	1.69653	4.74396e-13	1.7714e-10	-	NC_999999999.1	4683002	4685035	+	2034	protein_coding	TRAP transporter permease && PF06808:Tripartite ATP-independent periplasmic transporter, DctM component	-
SBAL678_RS42795	842.251	615.442	888.887	177.921	270.69	185.99	782.193	211.534	1.88634	6.97899e-13	2.18221e-10	-	NC_999999999.1	4461602	4462144	+	543	protein_coding	hydrolase && PF00857:Isochorismatase family	Isochorismatase
SBAL678_RS42925	273.855	126.996	261.142	40.4851	35.7161	45.6202	220.664	40.6071	2.44214	7.01299e-13	2.18221e-10	-	NC_999999999.1	4495644	4496426	+	783	protein_coding	4Fe-4S dicluster domain-containing protein && PF13247:4Fe-4S dicluster domain	-
SBAL678_RS23420	26193.5	9792.8	23253.7	3517.94	4117.69	3874.21	19746.7	3836.61	2.3637	8.01882e-13	2.30325e-10	fadB	NC_999999999.1	22892	25042	-	2151	protein_coding	fatty acid oxidation complex subunit alpha FadB && PF00725:3-hydroxyacyl-CoA dehydrogenase, C-terminal domain|PF02737:3-hydroxyacyl-CoA dehydrogenase, NAD binding domain|PF00378:Enoyl-CoA hydratase/isomerase	3HCDH_N
SBAL678_RS42360	4637.8	3748.01	5113.36	1005.73	1399.51	1604.6	4499.72	1336.62	1.75093	1.6491e-12	4.37267e-10	-	NC_999999999.1	4360099	4361055	+	957	protein_coding	DUF4097 family beta strand repeat protein && PF13349:Putative adhesin	-
SBAL678_RS23415	6783.32	2953.47	6144.87	1289.13	1170.17	1127.35	5293.89	1195.55	2.14679	1.75656e-12	4.37267e-10	fadA	NC_999999999.1	21706	22869	-	1164	protein_coding	acetyl-CoA C-acyltransferase FadA && PF02803:Thiolase, C-terminal domain|PF00108:Thiolase, N-terminal domain	Thiolase_N
SBAL678_RS34240	2077.55	1268.87	1960.57	295.115	536.682	459.712	1769	430.503	2.03817	2.75585e-12	6.43148e-10	-	NC_999999999.1	2538908	2539546	+	639	protein_coding	TetR/AcrR family transcriptional regulator && PF00440:Bacterial regulatory proteins, tetR family	TetR_N
SBAL678_RS30110	1244.17	1009.45	1450.34	280.199	441.752	402.686	1234.65	374.879	1.71877	1.8754e-11	4.11926e-09	-	NC_999999999.1	1574040	1575608	+	1569	protein_coding	methyl-accepting chemotaxis protein && PF00015:Methyl-accepting chemotaxis protein (MCP) signalling domain	-
SBAL678_RS42355	810.728	604.587	1001.38	188.575	230.275	289.513	805.565	236.121	1.76924	7.31372e-11	1.51719e-08	-	NC_999999999.1	4359518	4360102	+	585	protein_coding	hypothetical protein && -	-
SBAL678_RS29185	548.695	295.238	529.314	102.278	116.547	143.879	457.749	120.902	1.91942	9.08298e-11	1.78504e-08	-	NC_999999999.1	1350812	1352695	+	1884	protein_coding	VWA domain-containing protein && PF12450:von Willebrand factor|PF13519:von Willebrand factor type A domain|PF12034:Domain of unknown function (DUF3520)	-
SBAL678_RS42740	5254.47	2741.81	4509.72	585.968	958.696	1294.04	4168.66	946.233	2.13891	9.74392e-11	1.81919e-08	-	NC_999999999.1	4449960	4450586	-	627	protein_coding	DUF5610 domain-containg protein && -	-
SBAL678_RS35330	4490.04	1652.03	4128.05	766.02	813.011	705.359	3423.37	761.464	2.16869	1.17525e-10	2.0897e-08	-	NC_999999999.1	2769124	2770881	-	1758	protein_coding	acyl-CoA dehydrogenase && PF00441:Acyl-CoA dehydrogenase, C-terminal domain|PF12806:Acetyl-CoA dehydrogenase C-terminal like|PF02771:Acyl-CoA dehydrogenase, N-terminal domain|PF02770:Acyl-CoA dehydrogenase, middle domain|PF12418:Acyl-CoA dehydrogenase N terminal	-
SBAL678_RS37715	4249.67	2614.81	3612.8	1101.62	1258.52	1274.73	3492.43	1211.63	1.52723	1.75479e-10	2.97835e-08	fadJ	NC_999999999.1	3351223	3353343	-	2121	protein_coding	fatty acid oxidation complex subunit alpha FadJ && PF02737:3-hydroxyacyl-CoA dehydrogenase, NAD binding domain|PF00378:Enoyl-CoA hydratase/isomerase|PF00725:3-hydroxyacyl-CoA dehydrogenase, C-terminal domain	3HCDH_N
SBAL678_RS37215	405.857	251.821	376.647	117.194	97.7493	107.909	344.775	107.617	1.68139	2.10942e-10	3.4246e-08	-	NC_999999999.1	3219523	3221370	-	1848	protein_coding	cyclic nucleotide-binding/CBS domain-containing protein && PF00027:Cyclic nucleotide-binding domain|PF00571:CBS domain|PF03445:Putative nucleotidyltransferase DUF294|PF10335:Putative nucleotidyltransferase substrate binding domain	CBS
SBAL678_RS41735	1848.03	1127.77	1834.02	461.317	597.775	475.503	1603.27	511.532	1.64814	2.55184e-10	3.97024e-08	-	NC_999999999.1	4221381	4221566	+	186	protein_coding	hypothetical protein && -	-
SBAL678_RS42500	11088.2	4318.95	5502.06	917.307	1537.67	1921.31	6969.72	1458.76	2.25616	1.07163e-09	1.60059e-07	-	NC_999999999.1	4394855	4396039	-	1185	protein_coding	DUF3103 domain-containing protein && PF11301:Protein of unknown function (DUF3103)	-
SBAL678_RS41630	1917.97	1674.83	2491.9	725.535	822.41	793.09	2028.23	780.345	1.37796	1.12042e-09	1.6091e-07	-	NC_999999999.1	4188373	4190265	+	1893	protein_coding	methyl-accepting chemotaxis protein && PF00672:HAMP domain|PF02743:Cache domain|PF00015:Methyl-accepting chemotaxis protein (MCP) signalling domain	Cache_1
SBAL678_RS43755	4471.32	2109	4083.86	705.293	960.575	1170.33	3554.73	945.401	1.91048	1.28968e-09	1.78358e-07	-	NC_999999999.1	4681845	4682801	+	957	protein_coding	TAXI family TRAP transporter solute-binding subunit && PF16868:NMT1-like family	-
SBAL678_RS35435	3262.62	2460.68	3265.28	887.475	1266.04	1257.19	2996.19	1136.9	1.39774	4.67262e-09	6.23127e-07	-	NC_999999999.1	2795540	2797558	-	2019	protein_coding	NADPH-dependent 2%2C4-dienoyl-CoA reductase && PF00724:NADH:flavin oxidoreductase / NADH oxidase family|PF07992:Pyridine nucleotide-disulphide oxidoreductase	Oxidored_FMN
SBAL678_RS37060	582.188	407.038	492.152	137.436	141.925	221.96	493.793	167.107	1.56125	1.08699e-08	1.39959e-06	-	NC_999999999.1	3181890	3182684	-	795	protein_coding	TIGR00266 family protein && PF01987:Mitochondrial biogenesis AIM24	-
SBAL678_RS46955	587.113	418.978	625.736	201.36	227.455	215.819	543.942	214.878	1.33995	2.10687e-08	2.62235e-06	-	NC_999999999.1	3561440	3562339	+	900	protein_coding	flagellar hook-length control protein FliK && -	-
SBAL678_RS30770	27.5825	93.3474	64.2811	345.189	227.455	218.451	61.737	263.698	-2.09742	3.72679e-08	4.48898e-06	-	NC_999999999.1	1757221	1758090	-	870	protein_coding	helix-turn-helix domain-containing protein && -	-
SBAL678_RS39600	529.978	178.011	410.796	61.793	87.4105	114.051	372.929	87.7514	2.08526	4.96658e-08	5.79538e-06	-	NC_999999999.1	3731549	3732055	+	507	protein_coding	hypothetical protein && -	-
SBAL678_RS31605	2565.17	875.946	1522.66	163.006	299.827	531.651	1654.59	331.495	2.31842	6.43757e-08	7.28421e-06	-	NC_999999999.1	1959293	1959889	-	597	protein_coding	YIP1 family protein && PF06930:Protein of unknown function (DUF1282)	-
SBAL678_RS25900	579.232	314.776	507.218	181.117	164.482	163.18	467.075	169.593	1.46274	9.00254e-08	9.88691e-06	-	NC_999999999.1	558700	559638	+	939	protein_coding	paraslipin && PF01145:SPFH domain / Band 7 family|PF16200:C-terminal region of band_7	-
SBAL678_RS35615	201.943	92.262	208.913	34.0927	46.055	54.3934	167.706	44.847	1.89961	1.11689e-07	1.19157e-05	-	NC_999999999.1	2841121	2843253	+	2133	protein_coding	glycoside hydrolase family 97 protein && PF14509:Glycosyl-hydrolase 97 C-terminal, oligomerisation|PF14508:Glycosyl-hydrolase 97 N-terminal|PF10566:Glycoside hydrolase 97	-
SBAL678_RS36755	21.672	43.4174	29.1274	149.156	123.127	78.9581	31.4056	117.08	-1.90098	1.24328e-07	1.28956e-05	-	NC_999999999.1	3123232	3123318	-	87	protein_coding	tRNA-Leu && -	-
SBAL678_RS37710	1002.82	1148.39	1435.28	368.627	498.146	576.394	1195.5	481.056	1.31244	2.16234e-07	2.13105e-05	-	NC_999999999.1	3349889	3350320	+	432	protein_coding	hypothetical protein && -	-
SBAL678_RS35265	836.341	599.16	1051.6	216.276	298.887	365.839	829.033	293.667	1.49617	2.16872e-07	2.13105e-05	eco	NC_999999999.1	2752279	2752830	+	552	protein_coding	serine protease inhibitor ecotin && PF03974:Ecotin	-
SBAL678_RS33085	1805.67	1214.6	2646.57	620.061	714.322	672.021	1888.95	668.801	1.49794	2.37952e-07	2.27824e-05	-	NC_999999999.1	2274206	2275726	-	1521	protein_coding	methyl-accepting chemotaxis protein && PF00015:Methyl-accepting chemotaxis protein (MCP) signalling domain	-
SBAL678_RS25430	928.939	443.943	888.887	133.175	197.378	305.305	753.923	211.953	1.82914	2.78798e-07	2.60258e-05	-	NC_999999999.1	458356	458685	-	330	protein_coding	hypothetical protein && -	-
SBAL678_RS41680	458.066	511.24	528.31	205.622	266.931	211.432	499.205	227.995	1.13009	3.25591e-07	2.96526e-05	-	NC_999999999.1	4202845	4204317	-	1473	protein_coding	carbon starvation protein A && PF13722:5TM C-terminal transporter carbon starvation CstA|PF02554:Carbon starvation protein CstA	-
SBAL678_RS24220	633.412	613.271	645.824	294.049	300.767	343.029	630.836	312.615	1.01224	4.43811e-07	3.94569e-05	-	NC_999999999.1	210908	212770	+	1863	protein_coding	MFS transporter && PF07690:Major Facilitator Superfamily|PF01553:Acyltransferase	Acyltransferase
SBAL678_RS45405	6366.63	3203.12	4473.56	1387.15	1498.2	2144.15	4681.1	1676.5	1.48127	5.64637e-07	4.90315e-05	-	NC_999999999.1	5078213	5079715	+	1503	protein_coding	DUF3300 domain-containing protein && PF11737:Protein of unknown function (DUF3300)	-
SBAL678_RS37720	2976.94	2076.44	2904.7	929.026	1289.54	1233.5	2652.69	1150.69	1.20476	6.22079e-07	5.27919e-05	fadI	NC_999999999.1	3353349	3354659	-	1311	protein_coding	acetyl-CoA C-acyltransferase FadI && PF00108:Thiolase, N-terminal domain|PF02803:Thiolase, C-terminal domain	Thiolase_N
SBAL678_RS38260	422.603	315.862	274.199	84.1663	105.269	164.057	337.555	117.831	1.5151	6.65477e-07	5.52198e-05	-	NC_999999999.1	3448587	3449243	+	657	protein_coding	TRAP transporter small permease && PF04290:Tripartite ATP-independent periplasmic transporters, DctQ component	-
SBAL678_RS42930	77.822	61.8698	108.474	34.0927	15.9783	15.7916	82.7221	21.9542	1.93021	6.88124e-07	5.58577e-05	nrfD	NC_999999999.1	4496416	4497498	+	1083	protein_coding	polysulfide reductase NrfD && PF03916:Polysulphide reductase, NrfD	-
SBAL678_RS44675	1185.06	951.927	1342.87	549.745	586.496	471.117	1159.95	535.786	1.11477	7.81182e-07	6.10666e-05	-	NC_999999999.1	4908696	4910747	-	2052	protein_coding	type IV pilus secretin PilQ family protein && PF03958:Bacterial type II/III secretion system short domain|PF00263:Bacterial type II and III secretion system protein|PF07660:Secretin and TonB N terminus short domain	-
SBAL678_RS39035	3196.61	2040.62	3239.16	1096.29	1249.12	1317.72	2825.47	1221.05	1.21031	7.85002e-07	6.10666e-05	-	NC_999999999.1	3620255	3620887	-	633	protein_coding	hypothetical protein && -	-
SBAL678_RS33670	1262.88	1060.47	1463.4	605.145	600.595	633.419	1262.25	613.053	1.04198	9.01808e-07	6.87215e-05	-	NC_999999999.1	2413043	2414416	+	1374	protein_coding	TIGR03503 family protein && -	-
SBAL678_RS33135	1239.24	1265.62	2047.95	286.592	402.276	716.764	1517.6	468.544	1.69461	9.47474e-07	7.07574e-05	-	NC_999999999.1	2285528	2286493	+	966	protein_coding	suppressor of fused domain protein && PF05076:Suppressor of fused protein (SUFU)	-
SBAL678_RS31975	3295.12	2006.97	3916.12	1072.85	1340.29	1229.11	3072.74	1214.09	1.33963	1.05903e-06	7.68728e-05	-	NC_999999999.1	2040672	2041130	-	459	protein_coding	hypothetical protein && PF14282:FlxA-like protein	-
SBAL678_RS39030	1701.25	1022.48	1703.45	449.597	624.092	670.267	1475.73	581.319	1.34362	1.07054e-06	7.68728e-05	-	NC_999999999.1	3619809	3620258	-	450	protein_coding	hypothetical protein && PF02169:LPP20 lipoprotein	-
SBAL678_RS45030	1029.42	1317.72	761.329	238.649	233.095	514.982	1036.16	328.909	1.65417	1.39262e-06	9.8114e-05	-	NC_999999999.1	4993123	4994331	-	1209	protein_coding	multidrug effflux MFS transporter && PF07690:Major Facilitator Superfamily	MFS_1
SBAL678_RS32410	3354.23	2423.78	3609.78	1226.27	1406.09	1639.7	3129.26	1424.02	1.13571	1.83006e-06	0.000126545	-	NC_999999999.1	2133104	2133973	+	870	protein_coding	OmpA family protein && PF00691:OmpA family	-
SBAL678_RS29495	141.853	154.132	140.615	67.12	65.7928	58.7799	145.533	63.8976	1.18883	2.10297e-06	0.000140364	-	NC_999999999.1	1426365	1427180	+	816	protein_coding	ABC transporter permease subunit && PF00528:Binding-protein-dependent transport system inner membrane component	BPD_transp_1
SBAL678_RS31890	122.151	71.6387	190.834	43.6813	36.656	33.3379	128.208	37.8917	1.76308	2.10508e-06	0.000140364	-	NC_999999999.1	2020969	2021739	+	771	protein_coding	TSUP family transporter && PF01925:Sulfite exporter TauE/SafE	-
SBAL678_RS38255	1929.79	1097.38	1346.89	327.077	441.752	726.415	1458.02	498.414	1.54781	2.22485e-06	0.000143936	-	NC_999999999.1	3447508	3448527	+	1020	protein_coding	TRAP transporter substrate-binding protein && PF03480:Bacterial extracellular solute-binding protein, family 7	-
SBAL678_RS43885	14360.6	12354.4	13613.5	7674.05	7318.04	6991.3	13442.9	7327.8	0.875423	2.23575e-06	0.000143936	acnB	NC_999999999.1	4715380	4717977	-	2598	protein_coding	bifunctional aconitate hydratase 2/2-methylisocitrate dehydratase && PF11791:Aconitate B N-terminal domain|PF00330:Aconitase family (aconitate hydratase)|PF06434:Aconitate hydratase 2 N-terminus	Aconitase
SBAL678_RS36470	573.322	432.003	533.332	198.164	271.63	242.138	512.886	237.311	1.11114	2.36835e-06	0.000149889	cobB	NC_999999999.1	3055491	3056222	-	732	protein_coding	NAD-dependent protein deacylase && PF02146:Sir2 family	SIR2
SBAL678_RS25890	390.095	248.565	303.326	149.156	134.405	130.72	313.995	138.093	1.18681	2.78313e-06	0.000173203	-	NC_999999999.1	557282	557752	+	471	protein_coding	NfeD family protein && PF01957:NfeD-like C-terminal, partner-binding	-
SBAL678_RS39020	2405.59	1480.53	2572.25	815.028	1003.81	968.553	2152.79	929.131	1.21219	3.07747e-06	0.000188381	flgM	NC_999999999.1	3618906	3619229	+	324	protein_coding	flagellar biosynthesis anti-sigma factor FlgM && PF04316:Anti-sigma-28 factor, FlgM	-
SBAL678_RS28080	8475.71	5804.91	8779.39	3685.21	3967.31	3161.83	7686.67	3604.78	1.09251	3.72859e-06	0.000221576	-	NC_999999999.1	1088138	1088827	-	690	protein_coding	PspA/IM30 family protein && PF04012:PspA/IM30 family	-
SBAL678_RS37795	332.96	245.308	331.449	150.221	141.925	132.474	303.239	141.54	1.10088	3.73842e-06	0.000221576	-	NC_999999999.1	3372715	3372927	+	213	protein_coding	DUF2892 domain-containing protein && PF11127:Protein of unknown function (DUF2892)	-
SBAL678_RS28225	1941.61	1464.25	1334.84	437.878	542.321	871.171	1580.23	617.123	1.35579	4.10134e-06	0.000237828	pntB	NC_999999999.1	1125506	1126990	-	1485	protein_coding	Re/Si-specific NAD(P)(+) transhydrogenase subunit beta && PF02233:NAD(P) transhydrogenase beta subunit	-
SBAL678_RS28670	711.234	477.592	697.048	298.311	244.373	314.955	628.625	285.88	1.13714	4.14002e-06	0.000237828	-	NC_999999999.1	1237291	1238715	-	1425	protein_coding	coniferyl aldehyde dehydrogenase && PF00171:Aldehyde dehydrogenase family	Aldedh
SBAL678_RS28095	410.782	401.611	424.858	194.968	230.275	212.31	412.417	212.517	0.955887	4.33339e-06	0.000245165	-	NC_999999999.1	1091060	1091959	-	900	protein_coding	DUF350 domain-containing protein && PF03994:Domain of Unknown Function (DUF350)	-
SBAL678_RS25895	948.641	517.753	737.223	315.357	328.964	314.955	734.539	319.759	1.20023	4.61304e-06	0.000257091	-	NC_999999999.1	557765	558700	+	936	protein_coding	paraslipin && PF01145:SPFH domain / Band 7 family|PF16200:C-terminal region of band_7	-
SBAL678_RS36765	39.4036	81.4076	62.2723	231.191	217.116	113.173	61.0278	187.16	-1.61785	5.44172e-06	0.000294849	-	NC_999999999.1	3123486	3123561	-	76	protein_coding	tRNA-Gly && -	-
SBAL678_RS27925	1994.81	887.886	1351.91	373.954	481.228	660.616	1411.53	505.266	1.48168	5.44846e-06	0.000294849	-	NC_999999999.1	1050822	1052417	+	1596	protein_coding	GMC family oxidoreductase && PF05199:GMC oxidoreductase|PF00732:GMC oxidoreductase	-
SBAL678_RS35815	273.855	242.052	336.471	82.0355	132.526	140.37	284.126	118.31	1.26085	6.19135e-06	0.000324617	-	NC_999999999.1	2887428	2888786	+	1359	protein_coding	PLP-dependent aminotransferase family protein && PF00392:Bacterial regulatory proteins, gntR family|PF00155:Aminotransferase class I and II	Aminotran_1_2
SBAL678_RS34335	74.8668	142.192	77.3382	204.556	285.729	281.617	98.1323	257.301	-1.39434	6.24256e-06	0.000324617	earP	NC_999999999.1	2563764	2564942	-	1179	protein_coding	elongation factor P maturation arginine rhamnosyltransferase EarP && PF10093:Uncharacterized protein conserved in bacteria (DUF2331)	-
SBAL678_RS27920	1257.96	582.879	891.9	169.398	334.604	394.791	910.912	299.597	1.6032	6.25935e-06	0.000324617	-	NC_999999999.1	1050246	1050752	+	507	protein_coding	hypothetical protein && -	-
SBAL678_RS25635	89.6431	137.85	99.4348	333.469	242.494	213.187	108.976	263.05	-1.27162	6.89391e-06	0.000352628	-	NC_999999999.1	500771	502237	+	1467	protein_coding	hypothetical protein && -	-
SBAL678_RS41565	41.3737	84.664	45.1976	189.641	155.083	128.965	57.0784	157.896	-1.47087	7.6041e-06	0.000383699	-	NC_999999999.1	4173002	4173556	+	555	protein_coding	TMEM165/GDT1 family protein && PF01169:Uncharacterized protein family UPF0016	-
SBAL678_RS41535	383.2	342.998	533.332	152.352	209.597	199.15	419.843	187.033	1.1655	8.66785e-06	0.000431543	-	NC_999999999.1	4162330	4163787	-	1458	protein_coding	DUF4892 domain-containing protein && PF00691:OmpA family|PF16234:Domain of unknown function (DUF4892)	-
SBAL678_RS33045	3655.67	2734.21	3517.38	1085.64	1735.99	1705.5	3302.42	1509.04	1.12965	9.06997e-06	0.000445622	fadD	NC_999999999.1	2267210	2268883	+	1674	protein_coding	long-chain-fatty-acid--CoA ligase FadD && PF13193:AMP-binding enzyme C-terminal domain|PF00501:AMP-binding enzyme	AMP-binding
SBAL678_RS38350	4516.63	2587.68	4911.48	1603.42	1829.04	1837.09	4005.26	1756.52	1.18918	1.07706e-05	0.000522305	-	NC_999999999.1	3470076	3472190	-	2115	protein_coding	S8 family serine peptidase && PF00082:Subtilase family|PF01483:Proprotein convertase P-domain	Peptidase_S8
SBAL678_RS24830	1685.49	1087.61	1723.54	657.35	707.743	781.685	1498.88	715.593	1.06661	1.33238e-05	0.000637836	-	NC_999999999.1	324314	325963	-	1650	protein_coding	electron transfer flavoprotein-ubiquinone oxidoreductase && PF13450:NAD(P)-binding Rossmann-like domain|PF05187:Electron transfer flavoprotein-ubiquinone oxidoreductase, 4Fe-4S	-
SBAL678_RS26985	444.275	300.666	399.748	180.052	159.783	204.414	381.563	181.416	1.07269	1.36563e-05	0.000645477	-	NC_999999999.1	857367	857600	-	234	protein_coding	transposase && PF01527:Transposase	Transposase_8
SBAL678_RS37870	38.4185	94.4329	46.202	189.641	165.422	145.634	59.6845	166.899	-1.48744	1.45588e-05	0.000679533	-	NC_999999999.1	3387278	3387949	+	672	protein_coding	RNA pseudouridine synthase && PF00849:RNA pseudouridylate synthase	-
SBAL678_RS36915	168.45	107.458	179.786	56.466	65.7928	68.4304	151.898	63.5631	1.25611	1.55747e-05	0.000717976	-	NC_999999999.1	3150946	3151374	-	429	protein_coding	hypothetical protein && -	-
SBAL678_RS35835	2092.33	1915.79	1167.1	284.461	669.207	796.6	1725.08	583.423	1.56328	1.66094e-05	0.000756337	ilvN	NC_999999999.1	2894918	2895412	+	495	protein_coding	acetolactate synthase small subunit && PF01842:ACT domain|PF10369:Small subunit of acetolactate synthase	ACT
SBAL678_RS39360	500.425	531.863	686	295.115	288.549	306.182	572.763	296.615	0.949306	1.94547e-05	0.000875225	-	NC_999999999.1	3693442	3694032	+	591	protein_coding	OmpA family protein && PF00691:OmpA family	-
SBAL678_RS44515	913.178	449.37	708.096	119.324	282.909	302.673	690.215	234.969	1.55316	2.08297e-05	0.000925931	-	NC_999999999.1	4874537	4875076	-	540	protein_coding	YbhB/YbcL family Raf kinase inhibitor-like protein && PF01161:Phosphatidylethanolamine-binding protein	-
SBAL678_RS46270	9.85089	51.0155	14.0615	121.455	89.2903	90.3632	24.9759	100.37	-2.01609	2.14356e-05	0.000941655	rnpA	NC_999999999.1	5287187	5287543	-	357	protein_coding	ribonuclease P protein component && PF00825:Ribonuclease P	-
SBAL678_RS27615	478.753	426.576	493.156	233.322	204.898	283.372	466.162	240.53	0.954029	2.44675e-05	0.00106235	modA	NC_999999999.1	970296	971087	-	792	protein_coding	molybdate ABC transporter substrate-binding protein && PF13531:Bacterial extracellular solute-binding protein	-
SBAL678_RS24640	1250.08	440.687	551.411	139.567	201.138	338.643	747.392	226.449	1.72155	2.578e-05	0.00110647	-	NC_999999999.1	282607	283053	-	447	protein_coding	DUF1924 domain-containing protein && PF09086:Domain of unknown function (DUF1924)	-
SBAL678_RS28465	39.4036	58.6135	39.1713	85.2317	112.788	164.935	45.7294	120.985	-1.40985	2.68468e-05	0.00113916	-	NC_999999999.1	1187129	1188337	-	1209	protein_coding	NupC/NupG family nucleoside CNT transporter && PF07662:Na+ dependent nucleoside transporter C-terminus|PF01773:Na+ dependent nucleoside transporter N-terminus|PF07670:Nucleoside recognition	-
SBAL678_RS31965	235.436	322.374	216.949	526.306	623.152	453.57	258.253	534.343	-1.0497	2.77532e-05	0.00116439	ribA	NC_999999999.1	2038927	2039541	+	615	protein_coding	GTP cyclohydrolase II && PF00925:GTP cyclohydrolase II	GTP_cyclohydro2
SBAL678_RS24645	1695.34	522.094	795.478	166.202	312.046	416.723	1004.3	298.324	1.75043	3.04491e-05	0.0012633	-	NC_999999999.1	283107	283694	-	588	protein_coding	cytochrome b561 && PF01292:Prokaryotic cytochrome b561	Ni_hydr_CYTB
SBAL678_RS38265	409.797	408.124	282.234	100.147	136.285	212.31	366.718	149.581	1.29057	3.21656e-05	0.0013092	-	NC_999999999.1	3449243	3450640	+	1398	protein_coding	TRAP transporter large permease subunit && PF06808:Tripartite ATP-independent periplasmic transporter, DctM component	-
SBAL678_RS32945	124.121	136.765	166.729	51.139	73.312	68.4304	142.538	64.2938	1.14493	3.23477e-05	0.0013092	-	NC_999999999.1	2247058	2247762	+	705	protein_coding	class GN sortase && PF04203:Sortase family	-
SBAL678_RS27095	7225.63	4164.82	5065.15	2126.53	2483.21	3039.01	5485.2	2549.58	1.1052	3.26073e-05	0.0013092	-	NC_999999999.1	875264	876616	-	1353	protein_coding	DegQ family serine endoprotease && PF13365:Trypsin-like peptidase domain|PF13180:PDZ domain	-
SBAL678_RS41425	1105.27	1363.31	1144	692.508	641.95	697.463	1204.19	677.307	0.830036	3.45135e-05	0.00137099	-	NC_999999999.1	4131928	4132560	-	633	protein_coding	NADH:ubiquinone reductase (Na(+)-transporting) subunit D && PF02508:Rnf-Nqr subunit, membrane protein	-
SBAL678_RS43930	164.51	255.077	204.896	978.034	428.593	368.471	208.161	591.7	-1.50678	3.5606e-05	0.0013995	pdhR	NC_999999999.1	4735678	4736430	-	753	protein_coding	pyruvate dehydrogenase complex transcriptional repressor PdhR && PF00392:Bacterial regulatory proteins, gntR family|PF07729:FCD domain	GntR
SBAL678_RS39930	469.887	227.941	466.038	182.183	132.526	163.18	387.956	159.296	1.28555	3.66849e-05	0.00141562	-	NC_999999999.1	3802270	3803166	-	897	protein_coding	peptidoglycan DD-metalloendopeptidase family protein && PF01551:Peptidase family M23|PF01476:LysM domain	Peptidase_M23
SBAL678_RS25905	9791.79	4231.03	7675.56	1751.51	3628	2721.42	7232.79	2700.31	1.42136	3.67742e-05	0.00141562	-	NC_999999999.1	559855	560079	-	225	protein_coding	hypothetical protein && -	-
SBAL678_RS42935	210.809	153.046	273.195	103.343	87.4105	94.7497	212.35	95.1679	1.15975	3.748e-05	0.00142806	ttrA	NC_999999999.1	4497534	4500641	+	3108	protein_coding	tetrathionate reductase subunit TtrA && PF01568:Molydopterin dinucleotide binding domain|PF00384:Molybdopterin oxidoreductase	-
SBAL678_RS25835	68.9562	27.1359	110.483	19.1771	19.7378	15.7916	68.8584	18.2355	1.92159	3.88019e-05	0.0014635	-	NC_999999999.1	545918	546247	-	330	protein_coding	c-type cytochrome && PF13442:Cytochrome C oxidase, cbb3-type, subunit III	-
SBAL678_RS28000	71.9115	121.569	84.3689	229.06	223.696	168.444	92.6164	207.067	-1.16221	4.09508e-05	0.00150373	-	NC_999999999.1	1067491	1069035	-	1545	protein_coding	DEAD/DEAH box helicase && PF00271:Helicase conserved C-terminal domain|PF00270:DEAD/DEAH box helicase	DEAD
SBAL678_RS33770	503.381	262.675	633.771	199.229	194.559	177.217	466.609	190.335	1.29456	4.11175e-05	0.00150373	-	NC_999999999.1	2439196	2441922	-	2727	protein_coding	TonB-dependent receptor && PF07715:TonB-dependent Receptor Plug Domain|PF00593:TonB dependent receptor	TonB_dep_Rec
SBAL678_RS40950	8.8658	7.59805	8.03513	31.9619	30.0767	28.9513	8.16633	30.33	-1.88945	4.16796e-05	0.00150373	-	NC_999999999.1	4034021	4034311	-	291	protein_coding	hypothetical protein && -	-
SBAL678_RS38720	81.7624	73.8096	85.3733	43.6813	25.3772	28.9513	80.3151	32.6699	1.30713	4.17209e-05	0.00150373	-	NC_999999999.1	3562397	3562705	+	309	protein_coding	hypothetical protein && PF01312:FlhB HrpN YscU SpaS Family	-
SBAL678_RS42350	1581.07	1861.52	2349.27	644.565	1067.72	1001.01	1930.62	904.434	1.09353	4.18821e-05	0.00150373	-	NC_999999999.1	4358985	4359518	+	534	protein_coding	RNA polymerase sigma factor && PF08281:Sigma-70, region 4|PF04542:Sigma-70 region 2	Sigma70_r2
SBAL678_RS39365	887.565	1095.2	1308.72	450.663	646.65	544.811	1097.16	547.374	1.0027	4.22976e-05	0.00150418	-	NC_999999999.1	3694065	3694892	+	828	protein_coding	mechanosensitive ion channel && PF00924:Mechanosensitive ion channel|PF05552:Conserved TM helix	-
SBAL678_RS31460	573.322	411.38	543.376	227.995	284.789	274.599	509.359	262.461	0.956146	4.49393e-05	0.00158305	-	NC_999999999.1	1921144	1921527	+	384	protein_coding	VOC family protein && PF12681:Glyoxalase-like domain	-
SBAL678_RS37180	121.166	432.003	287.256	932.222	853.427	643.07	280.142	809.573	-1.53172	5.17693e-05	0.0018066	-	NC_999999999.1	3212634	3212710	-	77	protein_coding	tRNA-Ile && -	-
SBAL678_RS43600	2043.07	1135.37	1950.53	565.726	781.055	921.178	1709.66	755.986	1.17695	5.28075e-05	0.00182577	-	NC_999999999.1	4646973	4649087	-	2115	protein_coding	M13 family metallopeptidase && PF05649:Peptidase family M13|PF01431:Peptidase family M13	-
SBAL678_RS39310	391.08	176.926	424.858	92.6895	81.7711	171.076	330.955	115.179	1.52117	5.38348e-05	0.00182939	-	NC_999999999.1	3683040	3683510	-	471	protein_coding	GNAT family N-acetyltransferase && -	-
SBAL678_RS23845	69.9413	107.458	75.3294	263.153	178.581	150.898	84.2429	197.544	-1.22944	5.3927e-05	0.00182939	hutC	NC_999999999.1	119724	120431	+	708	protein_coding	histidine utilization repressor && PF07702:UTRA domain|PF00392:Bacterial regulatory proteins, gntR family	UTRA
SBAL678_RS27510	673.801	543.803	666.916	289.788	377.839	345.661	628.173	337.763	0.894665	5.43821e-05	0.00182939	-	NC_999999999.1	946924	947661	-	738	protein_coding	enoyl-CoA hydratase && PF00378:Enoyl-CoA hydratase/isomerase	ECH
SBAL678_RS30420	776.25	811.906	951.159	489.017	483.107	479.89	846.438	484.005	0.806479	5.6191e-05	0.00187337	pomA	NC_999999999.1	1659072	1659839	+	768	protein_coding	flagellar motor protein PomA && PF01618:MotA/TolQ/ExbB proton channel family	-
SBAL678_RS28760	565.441	210.574	630.758	176.856	164.482	176.34	468.925	172.559	1.44286	5.72547e-05	0.00189194	-	NC_999999999.1	1254703	1256304	-	1602	protein_coding	AMP-binding protein && PF00501:AMP-binding enzyme|PF13193:AMP-binding enzyme C-terminal domain	AMP-binding
SBAL678_RS29225	400.931	390.757	386.691	1253.97	650.409	700.973	392.793	868.451	-1.14401	5.8489e-05	0.00191577	-	NC_999999999.1	1359805	1362171	-	2367	protein_coding	phosphoketolase family protein && PF09363:XFP C-terminal domain|PF09364:XFP N-terminal domain|PF03894:D-xylulose 5-phosphate/D-fructose 6-phosphate phosphoketolase	-
SBAL678_RS36970	27.5825	48.8446	40.1757	115.063	83.6509	84.222	38.8676	94.3119	-1.2802	6.56018e-05	0.00213006	-	NC_999999999.1	3164726	3165367	+	642	protein_coding	hypothetical protein && -	-
SBAL678_RS29040	22.657	24.965	20.0878	90.5587	60.1534	42.9883	22.57	64.5668	-1.51187	6.6799e-05	0.00213868	-	NC_999999999.1	1313373	1314299	-	927	protein_coding	hypothetical protein && PF13414:TPR repeat	-
SBAL678_RS31985	406.842	245.308	382.673	509.26	1266.98	860.643	344.941	878.962	-1.34935	6.70127e-05	0.00213868	-	NC_999999999.1	2041946	2043409	-	1464	protein_coding	carbon starvation protein A && PF13722:5TM C-terminal transporter carbon starvation CstA|PF02554:Carbon starvation protein CstA	-
SBAL678_RS32300	107.375	188.866	109.479	337.731	277.27	271.967	135.24	295.656	-1.12986	6.99548e-05	0.00221366	-	NC_999999999.1	2106087	2107046	+	960	protein_coding	ketoacyl-ACP synthase III && PF08545:3-Oxoacyl-[acyl-carrier-protein (ACP)] synthase III|PF08541:3-Oxoacyl-[acyl-carrier-protein (ACP)] synthase III C terminal	-
SBAL678_RS24635	862.938	469.993	425.862	109.736	161.662	323.728	586.265	198.375	1.56147	7.4367e-05	0.0023335	-	NC_999999999.1	281965	282516	-	552	protein_coding	diacylglycerol kinase && PF09626:Dihaem cytochrome c	-
SBAL678_RS39530	275.825	170.413	261.142	111.867	122.187	106.155	235.793	113.403	1.05732	7.51438e-05	0.00233822	-	NC_999999999.1	3719887	3720072	-	186	protein_coding	hypothetical protein && -	-
SBAL678_RS28100	763.444	811.906	928.058	436.813	525.403	454.448	834.469	472.221	0.821181	7.83075e-05	0.00239854	-	NC_999999999.1	1091973	1092947	-	975	protein_coding	hypothetical protein && -	-
SBAL678_RS26275	510.276	389.671	475.077	246.107	214.297	275.476	458.342	245.293	0.901948	7.8367e-05	0.00239854	-	NC_999999999.1	653250	654317	+	1068	protein_coding	c-type cytochrome && PF00034:Cytochrome c	-
SBAL678_RS27805	67.9711	49.93	80.3513	23.4387	28.1969	27.1967	66.0842	26.2774	1.3295	8.11436e-05	0.00246334	-	NC_999999999.1	1021470	1022180	-	711	protein_coding	ABC transporter ATP-binding protein && PF00005:ABC transporter|PF07673:Protein of unknown function (DUF1602)	ABC_tran
SBAL678_RS39010	4040.84	3432.15	4878.33	1753.64	2344.1	2410.85	4117.1	2169.53	0.924111	8.38248e-05	0.00252421	-	NC_999999999.1	3616997	3617917	-	921	protein_coding	chemotaxis protein CheV && PF00072:Response regulator receiver domain|PF01584:CheW-like domain	Response_reg
SBAL678_RS36895	143.823	398.355	204.896	526.306	703.983	679.04	249.025	636.443	-1.35523	8.67698e-05	0.00259199	apt	NC_999999999.1	3147676	3148230	-	555	protein_coding	adenine phosphoribosyltransferase && PF00156:Phosphoribosyl transferase domain	Pribosyltran
SBAL678_RS35550	735.862	388.586	447.959	212.014	179.52	292.145	524.135	227.893	1.20117	8.92585e-05	0.0026242	-	NC_999999999.1	2825544	2827967	-	2424	protein_coding	protein-glutamate methyltransferase && PF12118:SprA-related family	-
SBAL678_RS44290	828.46	759.805	773.382	264.218	379.719	503.577	787.215	382.505	1.0399	8.96698e-05	0.0026242	-	NC_999999999.1	4821703	4822836	-	1134	protein_coding	alanine--glyoxylate aminotransferase family protein && PF00266:Aminotransferase class-V	Aminotran_5
SBAL678_RS37390	181.256	202.976	193.848	63.9238	79.8913	121.069	192.693	88.2947	1.1206	8.99566e-05	0.0026242	-	NC_999999999.1	3268452	3269177	-	726	protein_coding	virulence factor && PF06057:Bacterial virulence protein (VirJ)	-
SBAL678_RS32685	27.5825	37.9902	37.1625	74.5778	88.3504	72.8169	34.2451	78.5817	-1.20076	9.24887e-05	0.00267558	-	NC_999999999.1	2191588	2191962	-	375	protein_coding	DUF2069 domain-containing protein && PF09842:Predicted membrane protein (DUF2069)	-
SBAL678_RS38230	22.657	61.8698	41.1801	166.202	153.203	67.553	41.9023	128.986	-1.62408	9.34159e-05	0.00267558	-	NC_999999999.1	3446221	3446296	+	76	protein_coding	tRNA-Val && -	-
SBAL678_RS38990	2595.71	1610.79	2482.86	844.86	946.477	1366.85	2229.78	1052.73	1.08251	9.38674e-05	0.00267558	flgD	NC_999999999.1	3614296	3615066	-	771	protein_coding	flagellar hook assembly protein FlgD && PF13861:FlgD Tudor-like domain|PF03963:Flagellar hook capping protein - N-terminal region|PF13860:FlgD Ig-like domain	-
SBAL678_RS46655	29.5527	32.5631	31.1361	117.194	84.5908	50.0068	31.084	83.9304	-1.4287	9.68084e-05	0.00272045	ffs	NC_999999999.1	1989217	1989314	+	98	protein_coding	signal recognition particle sRNA small type && -	-
SBAL678_RS37210	157.614	70.5533	121.531	49.0082	39.4757	50.8841	116.566	46.456	1.32933	9.69527e-05	0.00272045	-	NC_999999999.1	3218835	3219521	-	687	protein_coding	DNA polymerase III subunit epsilon && PF00929:Exonuclease	Exonuc_X-T
SBAL678_RS40310	179.286	118.312	210.922	72.447	88.3504	70.185	169.507	76.9941	1.1396	9.76273e-05	0.00272045	-	NC_999999999.1	3899685	3900116	+	432	protein_coding	CBS domain-containing protein && PF00571:CBS domain	CBS
SBAL678_RS37800	593.024	404.867	543.376	274.872	257.532	290.39	513.756	274.265	0.905852	0.000100167	0.00275169	-	NC_999999999.1	3373032	3373463	+	432	protein_coding	rhodanese-like domain-containing protein && PF00581:Rhodanese-like domain	Rhodanese
SBAL678_RS35905	365.468	1203.75	560.451	2604.89	2251.99	1347.55	709.889	2068.15	-1.54295	0.000100222	0.00275169	suhB	NC_999999999.1	2906137	2906940	+	804	protein_coding	inositol-1-monophosphatase && PF00459:Inositol monophosphatase family	-
SBAL678_RS28310	441.32	313.691	455.994	190.706	213.357	228.979	403.668	211.014	0.93549	0.000106787	0.00291054	-	NC_999999999.1	1148790	1151024	-	2235	protein_coding	EAL domain-containing protein && PF11849:Domain of unknown function (DUF3369)|PF00563:EAL domain|PF00990:Diguanylate cyclase, GGDEF domain	EAL
SBAL678_RS41205	151.704	73.8096	249.089	31.9619	58.2736	64.0438	158.201	51.4264	1.61785	0.000112999	0.00303851	-	NC_999999999.1	4080688	4081140	+	453	protein_coding	hypothetical protein && -	-
SBAL678_RS37770	383.2	383.159	288.26	656.284	580.857	665.88	351.54	634.34	-0.851755	0.00011311	0.00303851	-	NC_999999999.1	3365554	3366855	+	1302	protein_coding	transporter && PF03349:Outer membrane protein transport protein (OMPP1/FadL/TodX)	-
SBAL678_RS33610	199.973	267.017	191.839	479.429	446.451	349.17	219.61	425.017	-0.952787	0.000114274	0.00304784	-	NC_999999999.1	2399455	2400858	-	1404	protein_coding	DEAD/DEAH box helicase && PF00271:Helicase conserved C-terminal domain|PF00270:DEAD/DEAH box helicase	DEAD
SBAL678_RS32275	33.493	44.5028	45.1976	101.213	91.1701	78.9581	41.0645	90.447	-1.13873	0.000117593	0.00311414	-	NC_999999999.1	2102563	2103279	+	717	protein_coding	HAD-IA family hydrolase && PF00702:haloacid dehalogenase-like hydrolase	Hydrolase
SBAL678_RS39590	74.8668	67.297	83.3645	169.398	182.34	119.314	75.1761	157.018	-1.06017	0.000120901	0.00317918	-	NC_999999999.1	3729205	3730233	-	1029	protein_coding	MerR family transcriptional regulator && PF13411:MerR HTH family regulatory protein	-
SBAL678_RS31230	284.691	84.664	200.878	44.7467	68.6125	80.7127	190.078	64.6906	1.55291	0.000123663	0.00322906	-	NC_999999999.1	1864271	1865599	-	1329	protein_coding	DUF4785 family protein && PF16024:Domain of unknown function (DUF4785)	-
SBAL678_RS45900	61.0755	69.4679	57.2503	182.183	125.006	106.155	62.5979	137.781	-1.13599	0.000130244	0.0033773	-	NC_999999999.1	5200639	5201997	+	1359	protein_coding	isochorismate synthase && PF00425:chorismate binding enzyme	-
SBAL678_RS36060	401.916	392.928	355.555	144.894	177.641	252.666	383.466	191.734	0.997457	0.000133376	0.00343106	hisB	NC_999999999.1	2952124	2953215	+	1092	protein_coding	bifunctional histidinol-phosphatase/imidazoleglycerol-phosphate dehydratase HisB && PF00475:Imidazoleglycerol-phosphate dehydratase	-
SBAL678_RS30755	311.288	236.625	206.905	718.077	372.199	551.829	251.606	547.369	-1.12051	0.000134155	0.00343106	-	NC_999999999.1	1740928	1746897	-	5970	protein_coding	3-hydroxyacyl-[acyl-carrier-protein] dehydratase FabA && PF02801:Beta-ketoacyl synthase, C-terminal domain|PF00109:Beta-ketoacyl synthase, N-terminal domain|PF07977:FabA-like domain	ketoacyl-synt
SBAL678_RS45020	833.385	574.195	868.799	370.758	412.615	429.883	758.793	404.419	0.907783	0.000135701	0.003447	-	NC_999999999.1	4989716	4991836	+	2121	protein_coding	EAL domain-containing protein && PF00990:Diguanylate cyclase, GGDEF domain|PF00563:EAL domain|PF13426:PAS domain	EAL
SBAL678_RS44560	91.6133	96.6037	105.461	243.976	187.98	157.039	97.8927	196.331	-1.00182	0.000146861	0.00370528	-	NC_999999999.1	4887933	4889153	+	1221	protein_coding	threonine/serine exporter family protein && PF12821:Threonine/Serine exporter, ThrE|PF06738:Putative threonine/serine exporter	-
SBAL678_RS45225	463.977	185.609	386.691	92.6895	133.465	177.217	345.426	134.457	1.35969	0.000151068	0.00378583	coxB	NC_999999999.1	5035948	5037504	+	1557	protein_coding	cytochrome c oxidase subunit II && PF13442:Cytochrome C oxidase, cbb3-type, subunit III|PF02790:Cytochrome C oxidase subunit II, transmembrane domain|PF00116:Cytochrome C oxidase subunit II, periplasmic domain	-
SBAL678_RS35065	14.7763	28.2213	23.101	82.0355	61.0933	40.3564	22.0329	61.1618	-1.47271	0.000182582	0.00454507	-	NC_999999999.1	2703024	2703100	+	77	protein_coding	tRNA-Val && -	-
SBAL678_RS40785	33.493	87.9203	49.2152	196.033	139.105	109.664	56.8762	148.267	-1.38455	0.000184179	0.00455446	-	NC_999999999.1	4001898	4001982	-	85	protein_coding	tRNA-Leu && -	-
SBAL678_RS36285	262.034	675.141	426.866	1053.68	1222.81	890.472	454.68	1055.65	-1.21581	0.000185885	0.0045664	infA	NC_999999999.1	3007073	3007291	+	219	protein_coding	translation initiation factor IF-1 && PF01176:Translation initiation factor 1A / IF-1	-
SBAL678_RS29585	724.04	476.506	746.263	366.496	350.582	314.078	648.937	343.719	0.917689	0.000194564	0.00474838	-	NC_999999999.1	1454103	1456223	+	2121	protein_coding	methyl-accepting chemotaxis protein && PF00015:Methyl-accepting chemotaxis protein (MCP) signalling domain|PF00672:HAMP domain	HAMP
SBAL678_RS32345	5862.27	4982.15	6407.01	1454.27	2511.41	3673.31	5750.48	2546.33	1.17506	0.000200112	0.00484453	-	NC_999999999.1	2114289	2116079	+	1791	protein_coding	acyl-CoA dehydrogenase && PF12806:Acetyl-CoA dehydrogenase C-terminal like|PF02771:Acyl-CoA dehydrogenase, N-terminal domain|PF02770:Acyl-CoA dehydrogenase, middle domain|PF00441:Acyl-CoA dehydrogenase, C-terminal domain|PF12418:Acyl-CoA dehydrogenase N terminal	-
SBAL678_RS36465	184.212	137.85	175.769	59.6622	90.2302	92.9951	165.943	80.9625	1.03198	0.000201099	0.00484453	-	NC_999999999.1	3055045	3055494	-	450	protein_coding	ATP-binding protein && PF13671:AAA domain	-
SBAL678_RS35870	62.0606	105.287	86.3777	182.183	171.061	157.039	84.5752	170.094	-1.00976	0.000209875	0.00499778	hscB	NC_999999999.1	2900985	2901509	-	525	protein_coding	co-chaperone HscB && PF07743:HSCB C-terminal oligomerisation domain	-
SBAL678_RS45240	111.315	34.7339	135.593	33.0273	30.0767	28.9513	93.8806	30.6851	1.61687	0.000210137	0.00499778	-	NC_999999999.1	5039686	5040561	+	876	protein_coding	cytochrome c oxidase subunit 3 && PF00510:Cytochrome c oxidase subunit III	-
SBAL678_RS35290	15.7614	36.9048	43.1888	164.071	126.886	40.3564	31.9517	110.438	-1.78834	0.000217464	0.00513931	-	NC_999999999.1	2757189	2758304	+	1116	protein_coding	tyrosine-type recombinase/integrase && PF00589:Phage integrase family	Phage_integrase
SBAL678_RS36335	133.972	182.353	135.593	318.554	245.313	284.249	150.639	282.705	-0.908921	0.000221044	0.00519106	-	NC_999999999.1	3018224	3019363	+	1140	protein_coding	cupin && PF08007:Cupin superfamily protein	Cupin_4
SBAL678_RS35945	359.558	235.539	338.48	155.548	134.405	186.868	311.192	158.94	0.969229	0.000224547	0.00524036	-	NC_999999999.1	2916988	2918688	-	1701	protein_coding	hypothetical protein && -	-
SBAL678_RS28850	1363.36	861.836	1801.88	689.312	630.671	650.088	1342.36	656.69	1.03176	0.00024222	0.00558339	-	NC_999999999.1	1273850	1275871	-	2022	protein_coding	methyl-accepting chemotaxis protein && PF00015:Methyl-accepting chemotaxis protein (MCP) signalling domain|PF00672:HAMP domain|PF12729:Four helix bundle sensory module for signal transduction	HAMP
SBAL678_RS36515	10664.6	10945.5	10893.6	5135.21	6398.82	7405.39	10834.6	6313.14	0.779131	0.000242236	0.00558339	sdhA	NC_999999999.1	3065563	3067329	-	1767	protein_coding	succinate dehydrogenase flavoprotein subunit && PF02910:Fumarate reductase flavoprotein C-term|PF00890:FAD binding domain	-
SBAL678_RS35900	254.153	378.817	271.186	541.222	563.939	533.406	301.385	546.189	-0.858725	0.000245231	0.00561774	trmJ	NC_999999999.1	2905255	2905983	-	729	protein_coding	tRNA (cytosine(32)/uridine(32)-2'-O)-methyltransferase TrmJ && PF00588:SpoU rRNA Methylase family	SpoU_methylase
SBAL678_RS34455	182.241	501.471	293.282	695.704	776.355	785.195	325.665	752.418	-1.20921	0.00025648	0.00580948	ttcA	NC_999999999.1	2586131	2587099	-	969	protein_coding	tRNA 2-thiocytidine(32) synthetase TtcA && PF01171:PP-loop family	-
SBAL678_RS43790	106.39	237.71	134.588	399.524	300.767	357.066	159.563	352.452	-1.1449	0.000256712	0.00580948	-	NC_999999999.1	4689747	4690913	+	1167	protein_coding	MFS transporter && PF07690:Major Facilitator Superfamily	MFS_1
SBAL678_RS29480	2870.55	2132.88	3035.27	817.159	1533.91	1527.4	2679.57	1292.82	1.05117	0.000264306	0.00594528	-	NC_999999999.1	1423051	1424151	+	1101	protein_coding	polyamine ABC transporter substrate-binding protein && PF13416:Bacterial extracellular solute-binding protein	-
SBAL678_RS44460	669.861	432.003	581.543	218.406	265.051	359.698	561.136	281.052	0.996454	0.000270117	0.00603962	-	NC_999999999.1	4864736	4865572	-	837	protein_coding	hypothetical protein && -	-
SBAL678_RS37615	79.7922	172.584	128.562	357.973	269.751	222.837	126.98	283.52	-1.15957	0.000274632	0.00610403	-	NC_999999999.1	3322278	3322766	-	489	protein_coding	bacteriocin production protein && PF02674:Colicin V production protein	-
SBAL678_RS36770	155.644	350.596	236.032	629.649	581.797	421.987	247.424	544.478	-1.13856	0.00028448	0.0062855	pgsA	NC_999999999.1	3123782	3124330	-	549	protein_coding	CDP-diacylglycerol--glycerol-3-phosphate 3-phosphatidyltransferase && PF01066:CDP-alcohol phosphatidyltransferase	CDP-OH_P_transf
SBAL678_RS42790	50.2395	36.9048	59.2591	18.1117	10.3389	24.5647	48.8012	17.6718	1.46289	0.000291203	0.0063802	-	NC_999999999.1	4460919	4461257	-	339	protein_coding	P-II family nitrogen regulator && PF00543:Nitrogen regulatory protein P-II	-
SBAL678_RS35300	15.7614	40.1611	24.1054	91.6241	58.2736	60.5345	26.676	70.1441	-1.39875	0.000292184	0.0063802	-	NC_999999999.1	2760931	2761695	-	765	protein_coding	DTW domain-containing protein && PF03942:DTW domain	DTW
SBAL678_RS46945	598.934	509.069	737.223	274.872	320.505	395.668	615.076	330.348	0.895931	0.000296401	0.00643466	-	NC_999999999.1	3559934	3560653	+	720	protein_coding	flagellar hook-length control protein FliK && -	-
SBAL678_RS36440	75.8519	141.107	67.2942	221.603	196.439	197.395	94.7509	205.145	-1.11706	0.000303621	0.00655331	-	NC_999999999.1	3049527	3050876	+	1350	protein_coding	sensor histidine kinase && PF02518:Histidine kinase-, DNA gyrase B-, and HSP90-like ATPase	HATPase_c
SBAL678_RS43260	139.883	229.027	195.856	483.69	364.68	296.532	188.255	381.634	-1.01941	0.000307724	0.00656951	-	NC_999999999.1	4574932	4575675	-	744	protein_coding	1-acylglycerol-3-phosphate O-acyltransferase && PF01553:Acyltransferase	Acyltransferase
SBAL678_RS41675	3413.33	1662.89	1779.78	715.947	884.444	1356.32	2285.33	985.572	1.21311	0.000307891	0.00656951	katG	NC_999999999.1	4200368	4202533	-	2166	protein_coding	catalase/peroxidase HPI && PF00141:Peroxidase	-
SBAL678_RS31610	94.5686	115.056	109.479	210.949	207.717	167.567	106.368	195.411	-0.877173	0.000321198	0.0068145	-	NC_999999999.1	1960173	1960943	+	771	protein_coding	tRNA-(ms[2]io[6]A)-hydroxylase && PF06175:tRNA-(MS[2]IO[6]A)-hydroxylase (MiaE)	-
SBAL678_RS30650	768.369	678.397	704.079	454.924	384.418	457.08	716.948	432.141	0.730607	0.000324243	0.00684025	-	NC_999999999.1	1714785	1716494	+	1710	protein_coding	pyridine nucleotide-disulfide oxidoreductase family protein && PF07992:Pyridine nucleotide-disulphide oxidoreductase|PF02852:Pyridine nucleotide-disulphide oxidoreductase, dimerisation domain|PF00581:Rhodanese-like domain	Pyr_redox_2
SBAL678_RS32805	39.4036	93.3474	57.2503	252.499	140.985	107.032	63.3338	166.839	-1.39803	0.000338038	0.00709119	-	NC_999999999.1	2213287	2213910	+	624	protein_coding	prolyl 4-hydroxylase subunit alpha && PF13640:2OG-Fe(II) oxygenase superfamily	-
SBAL678_RS35160	35.4632	144.363	49.2152	205.622	230.275	214.942	76.3471	216.946	-1.51072	0.000342557	0.00714585	-	NC_999999999.1	2723864	2725474	+	1611	protein_coding	ABC-F family ATPase && PF12848:ABC transporter|PF00005:ABC transporter	ABC_tran
SBAL678_RS40835	85.7028	163.901	92.404	303.638	201.138	233.365	114.003	246.047	-1.11127	0.000350534	0.00723326	lnt	NC_999999999.1	4010537	4012111	+	1575	protein_coding	apolipoprotein N-acyltransferase && PF00795:Carbon-nitrogen hydrolase	CN_hydrolase
SBAL678_RS31005	770.34	1985.26	1032.51	2635.79	4058.48	2372.25	1262.71	3022.17	-1.2593	0.000350621	0.00723326	-	NC_999999999.1	1807589	1807798	-	210	protein_coding	cold-shock protein && PF00313:'Cold-shock' DNA-binding domain	CSD
SBAL678_RS40365	1204.76	880.288	1423.22	636.042	672.967	641.315	1169.42	650.108	0.847225	0.000356784	0.00730739	-	NC_999999999.1	3914138	3916519	+	2382	protein_coding	PilZ domain-containing protein && PF07238:PilZ domain	-
SBAL678_RS28975	349.707	124.825	218.957	68.1854	82.711	122.824	231.163	91.24	1.33948	0.000358129	0.00730739	-	NC_999999999.1	1303728	1304264	-	537	protein_coding	DUF4136 domain-containing protein && PF13590:Domain of unknown function (DUF4136)	-
SBAL678_RS34920	105.405	107.458	122.536	256.761	203.018	171.953	111.799	210.577	-0.911282	0.000371625	0.00754156	-	NC_999999999.1	2678351	2679976	+	1626	protein_coding	MATE family efflux transporter && PF01554:MatE	MatE
SBAL678_RS39730	527.023	416.807	568.486	275.938	243.433	326.36	504.105	281.91	0.838321	0.000375219	0.00755803	-	NC_999999999.1	3760213	3761781	+	1569	protein_coding	PAS domain-containing protein && PF08447:PAS fold|PF00015:Methyl-accepting chemotaxis protein (MCP) signalling domain	-
SBAL678_RS23800	78.8071	103.116	127.558	41.5505	62.0332	29.8286	103.16	44.4708	1.21526	0.000376485	0.00755803	-	NC_999999999.1	109422	109856	+	435	protein_coding	hypothetical protein && -	-
SBAL678_RS45380	3770.92	2405.32	3231.13	1116.54	1454.96	2092.39	3135.79	1554.63	1.01202	0.000403998	0.00806699	-	NC_999999999.1	5074405	5075361	-	957	protein_coding	GlyGly-CTERM sorting domain-containing protein && -	-
SBAL678_RS28075	960.462	912.851	846.702	498.606	578.037	593.063	906.672	556.569	0.703522	0.000424046	0.00842228	-	NC_999999999.1	1087323	1087976	-	654	protein_coding	hypothetical protein && PF13785:Domain of unknown function (DUF4178)	-
SBAL678_RS27675	16.7465	24.965	32.1405	62.8584	58.2736	52.6387	24.6174	57.9236	-1.23413	0.000433177	0.00855811	-	NC_999999999.1	985875	986651	-	777	protein_coding	deoxyribonuclease && PF04231:Endonuclease I	-
SBAL678_RS29340	198.003	200.806	229.001	463.448	411.675	287.758	209.27	387.627	-0.888073	0.000448772	0.00881954	-	NC_999999999.1	1386002	1388626	+	2625	protein_coding	TonB-dependent receptor && PF07715:TonB-dependent Receptor Plug Domain|PF00593:TonB dependent receptor	TonB_dep_Rec
SBAL678_RS37790	3374.92	1801.82	2673.69	1557.61	1306.46	1248.42	2616.81	1370.83	0.933027	0.000468402	0.00905941	-	NC_999999999.1	3369430	3372672	+	3243	protein_coding	efflux RND transporter permease subunit && PF00873:AcrB/AcrD/AcrF family	ACR_tran
SBAL678_RS40755	29.5527	47.7592	53.2328	134.24	111.848	64.9211	43.5149	103.67	-1.25068	0.000468786	0.00905941	-	NC_999999999.1	4000125	4000829	+	705	protein_coding	hypothetical protein && -	-
SBAL678_RS29745	12.8062	21.7087	10.0439	33.0273	45.1151	42.111	14.8529	40.0845	-1.44412	0.000470475	0.00905941	-	NC_999999999.1	1487226	1487603	-	378	protein_coding	DUF2721 domain-containing protein && PF11026:Protein of unknown function (DUF2721)	-
SBAL678_RS38195	93.5835	248.565	183.804	455.99	359.041	357.066	175.317	390.699	-1.15713	0.000470682	0.00905941	-	NC_999999999.1	3443286	3443361	-	76	protein_coding	tRNA-Ala && -	-
SBAL678_RS33785	217.705	474.335	345.511	691.442	697.404	691.322	345.85	693.39	-1.00438	0.000473535	0.00906758	-	NC_999999999.1	2445854	2447068	+	1215	protein_coding	RsmB/NOP family class I SAM-dependent RNA methyltransferase && PF01189:16S rRNA methyltransferase RsmF	-
SBAL678_RS42885	40.3887	141.107	80.3513	200.295	231.215	212.31	87.2822	214.606	-1.30132	0.000482689	0.00919572	-	NC_999999999.1	4483635	4484048	+	414	protein_coding	hypothetical protein && -	-
SBAL678_RS30310	128.062	255.077	166.729	291.919	420.134	421.11	183.289	377.721	-1.04539	0.000504233	0.00955739	-	NC_999999999.1	1630850	1632268	+	1419	protein_coding	DEAD/DEAH box helicase && PF00270:DEAD/DEAH box helicase|PF00271:Helicase conserved C-terminal domain	DEAD
SBAL678_RS46260	118.211	170.413	136.597	252.499	252.832	248.279	141.74	251.204	-0.827098	0.000512356	0.00964693	mnmE	NC_999999999.1	5283848	5285209	-	1362	protein_coding	tRNA uridine-5-carboxymethylaminomethyl(34) synthesis GTPase MnmE && PF12631:MnmE helical domain|PF10396:GTP-binding protein TrmE N-terminus|PF01926:50S ribosome-binding GTPase	-
SBAL678_RS36380	226.57	421.149	233.019	515.652	624.092	608.855	293.579	582.866	-0.99075	0.000514124	0.00964693	-	NC_999999999.1	3029757	3030821	+	1065	protein_coding	3-deoxy-7-phosphoheptulonate synthase && PF00793:DAHP synthetase I family	-
SBAL678_RS39490	66.9861	98.7746	64.2811	167.267	128.766	152.652	76.6806	149.562	-0.965699	0.00052797	0.00981515	mutY	NC_999999999.1	3715796	3716887	+	1092	protein_coding	A/G-specific adenine glycosylase && PF00633:Helix-hairpin-helix motif|PF00730:HhH-GPD superfamily base excision DNA repair protein|PF14815:NUDIX domain	HhH-GPD
SBAL678_RS25210	98.5089	264.846	155.681	384.608	378.779	377.244	173.012	380.21	-1.13769	0.000528346	0.00981515	gmk	NC_999999999.1	407053	407685	-	633	protein_coding	guanylate kinase && PF00625:Guanylate kinase	-
SBAL678_RS35555	643.263	265.932	434.902	135.305	165.422	269.335	448.032	190.021	1.23625	0.00053301	0.00985276	-	NC_999999999.1	2827973	2828236	-	264	protein_coding	hypothetical protein && -	-
SBAL678_RS36920	56.1501	105.287	44.1932	149.156	148.504	152.652	68.5435	150.104	-1.13496	0.000551077	0.0101366	-	NC_999999999.1	3151642	3152589	+	948	protein_coding	hypothetical protein && PF01207:Dihydrouridine synthase (Dus)	Dus
SBAL678_RS33035	535.888	424.405	493.156	232.256	292.308	316.71	484.483	280.425	0.787842	0.000595415	0.0108984	-	NC_999999999.1	2265308	2266120	+	813	protein_coding	class I SAM-dependent methyltransferase && -	-
SBAL678_RS31080	1117.09	753.292	1945.51	543.352	658.868	557.971	1271.96	586.73	1.11637	0.000599877	0.0109206	-	NC_999999999.1	1827081	1827881	+	801	protein_coding	phenylalanine 4-monooxygenase && PF00351:Biopterin-dependent aromatic amino acid hydroxylase	-
SBAL678_RS39265	134.957	283.299	98.4304	470.905	367.5	365.839	172.229	401.415	-1.22209	0.000602476	0.0109206	-	NC_999999999.1	3675168	3676259	+	1092	protein_coding	HlyC/CorC family transporter && PF01595:Domain of unknown function DUF21	-
SBAL678_RS45235	55.165	14.1107	53.2328	6.39238	14.0985	14.037	40.8361	11.5093	1.8189	0.000610072	0.0110049	-	NC_999999999.1	5039108	5039689	+	582	protein_coding	cytochrome c oxidase assembly protein && PF04442:Cytochrome c oxidase assembly protein CtaG/Cox11	-
SBAL678_RS36810	270.899	318.033	263.151	622.192	478.408	411.459	284.028	504.02	-0.826921	0.000625451	0.011228	fabA	NC_999999999.1	3132975	3133490	+	516	protein_coding	bifunctional 3-hydroxydecanoyl-ACP dehydratase/trans-2-decenoyl-ACP isomerase && PF07977:FabA-like domain	-
SBAL678_RS42975	803.833	535.12	713.118	344.123	390.997	431.638	684.023	388.919	0.814304	0.000630163	0.0112585	-	NC_999999999.1	4509624	4511843	-	2220	protein_coding	EAL domain-containing protein && PF00563:EAL domain|PF00990:Diguanylate cyclase, GGDEF domain	EAL
SBAL678_RS31415	97.5238	173.67	122.536	243.976	251.893	243.016	131.243	246.295	-0.910286	0.000669642	0.0119069	-	NC_999999999.1	1904480	1905388	+	909	protein_coding	alpha/beta fold hydrolase && PF00561:alpha/beta hydrolase fold	Abhydrolase_1
SBAL678_RS46950	93.5835	59.6989	100.439	37.2889	36.656	45.6202	84.5739	39.855	1.085	0.000680266	0.0120385	-	NC_999999999.1	3560801	3561075	+	275	protein_coding	collagen-like protein && PF01391:Collagen triple helix repeat (20 copies)	Collagen
SBAL678_RS40675	35.4632	97.6892	70.3074	137.436	157.903	157.039	67.8199	150.793	-1.15695	0.000683659	0.0120414	-	NC_999999999.1	3985398	3985474	-	77	protein_coding	tRNA-Met && -	-
SBAL678_RS43305	162.54	262.675	166.729	371.823	333.664	383.385	197.315	362.958	-0.880793	0.000693697	0.0121609	-	NC_999999999.1	4584939	4585769	-	831	protein_coding	dehydratase && PF01575:MaoC like domain	-
SBAL678_RS36210	105.405	264.846	155.681	351.581	432.353	343.029	175.31	375.654	-1.10127	0.000702784	0.0122534	-	NC_999999999.1	2993419	2994207	-	789	protein_coding	YchF/TatD family DNA exonuclease && PF01026:TatD related DNase	-
SBAL678_RS27875	263.019	512.325	288.26	782.001	710.563	609.732	354.535	700.765	-0.983649	0.00070554	0.0122534	-	NC_999999999.1	1041138	1042679	-	1542	protein_coding	polynucleotide adenylyltransferase PcnB && PF12627:Probable RNA and SrmB- binding site of polymerase A|PF12626:Polymerase A arginine-rich C-terminus|PF01743:Poly A polymerase head domain	-
SBAL678_RS38710	623.561	1275.39	779.408	1825.02	1817.76	1558.98	892.785	1733.92	-0.957967	0.00075234	0.0130028	-	NC_999999999.1	3558929	3559714	-	786	protein_coding	VacJ family lipoprotein && PF04333:MlaA lipoprotein	-
SBAL678_RS43410	888.55	538.376	804.518	403.785	364.68	463.221	743.815	410.562	0.857456	0.00075565	0.0130028	-	NC_999999999.1	4605621	4607063	-	1443	protein_coding	MBL fold metallo-hydrolase && PF16661:Metallo-beta-lactamase superfamily domain|PF07521:RNA-metabolising metallo-beta-lactamase|PF10996:Beta-Casp domain	-
SBAL678_RS37000	10.836	15.1961	29.1274	41.5505	48.8747	51.7614	18.3865	47.3955	-1.36712	0.000766134	0.0131017	-	NC_999999999.1	3170906	3171166	+	261	protein_coding	hypothetical protein && -	-
SBAL678_RS35760	103.434	169.328	106.466	243.976	236.854	224.592	126.409	235.141	-0.89732	0.000768416	0.0131017	can	NC_999999999.1	2876938	2877555	+	618	protein_coding	carbonate dehydratase && PF00484:Carbonic anhydrase	-
SBAL678_RS38975	1265.84	815.162	1417.2	544.418	623.152	725.537	1166.07	631.036	0.885669	0.000779551	0.0132311	flgG	NC_999999999.1	3611138	3611926	-	789	protein_coding	flagellar basal-body rod protein FlgG && PF00460:Flagella basal body rod protein|PF06429:Flagellar basal body rod FlgEFG protein C-terminal	-
SBAL678_RS33620	167.465	235.539	248.085	395.262	461.49	324.606	217.03	393.786	-0.859732	0.000784173	0.0132354	-	NC_999999999.1	2403470	2403790	-	321	protein_coding	hypothetical protein && -	-
SBAL678_RS35515	96.5387	274.615	137.602	401.655	380.659	354.434	169.585	378.916	-1.16158	0.000786893	0.0132354	cmoA	NC_999999999.1	2817100	2817831	+	732	protein_coding	carboxy-S-adenosyl-L-methionine synthase CmoA && PF12847:Methyltransferase domain	-
SBAL678_RS28980	199.973	93.3474	137.602	66.0546	64.8529	74.5715	143.641	68.493	1.06923	0.000800784	0.0134086	-	NC_999999999.1	1304470	1304775	+	306	protein_coding	DUF1289 domain-containing protein && PF06945:Protein of unknown function (DUF1289)	-
SBAL678_RS23485	626.517	321.289	651.85	317.488	252.832	214.942	533.219	261.754	1.028	0.00081348	0.0135604	dprA	NC_999999999.1	37747	38763	+	1017	protein_coding	DNA-protecting protein DprA && PF02481:DNA recombination-mediator protein A	SMF
SBAL678_RS47340	0	1.08544	2.00878	7.45778	11.2788	14.037	1.03141	10.9245	-3.42266	0.000830096	0.0137759	-	NC_999999999.1	2056298	2056357	+	60	protein_coding	hypothetical protein && -	-
SBAL678_RS32405	80.7773	156.303	72.3162	208.818	234.974	198.273	103.132	214.022	-1.05607	0.000840826	0.0138509	rnt	NC_999999999.1	2132291	2132962	-	672	protein_coding	ribonuclease T && PF00929:Exonuclease	Exonuc_X-T
SBAL678_RS42680	3360.14	3695.91	4024.6	1810.11	2331.89	2549.47	3693.55	2230.49	0.727436	0.000842032	0.0138509	mdh	NC_999999999.1	4437364	4438299	-	936	protein_coding	malate dehydrogenase && PF02866:lactate/malate dehydrogenase, alpha/beta C-terminal domain|PF00056:lactate/malate dehydrogenase, NAD binding domain	-
SBAL678_RS36900	16.7465	61.8698	26.1142	86.2971	98.6892	83.3447	34.9102	89.4437	-1.36503	0.000857266	0.0140396	-	NC_999999999.1	3148492	3148860	-	369	protein_coding	YbaN family protein && PF04304:Protein of unknown function (DUF454)	-
SBAL678_RS43360	1005.78	796.71	1405.14	326.011	655.109	575.517	1069.21	518.879	1.0425	0.00087183	0.014163	-	NC_999999999.1	4593822	4594094	+	273	protein_coding	HU family DNA-binding protein && PF00216:Bacterial DNA-binding protein	-
SBAL678_RS41330	324.094	155.217	282.234	84.1663	123.127	148.266	253.849	118.52	1.09714	0.000872383	0.014163	-	NC_999999999.1	4110171	4110473	+	303	protein_coding	hypothetical protein && -	-
SBAL678_RS24780	167.465	108.544	156.685	61.793	73.312	88.6085	144.231	74.5712	0.949618	0.000901841	0.0145778	-	NC_999999999.1	311428	313383	+	1956	protein_coding	methyl-accepting chemotaxis protein && PF00015:Methyl-accepting chemotaxis protein (MCP) signalling domain	-
SBAL678_RS35890	271.885	477.592	429.88	833.14	741.579	610.609	393.119	728.443	-0.890032	0.000927918	0.0148762	iscR	NC_999999999.1	2903580	2904041	-	462	protein_coding	Fe-S cluster assembly transcriptional regulator IscR && PF02082:Transcriptional regulator	Rrf2
SBAL678_RS38995	742.757	608.929	732.202	330.273	429.533	470.239	694.629	410.015	0.759751	0.000930059	0.0148762	flgC	NC_999999999.1	3615091	3615507	-	417	protein_coding	flagellar basal body rod protein FlgC && PF06429:Flagellar basal body rod FlgEFG protein C-terminal|PF00460:Flagella basal body rod protein	-
SBAL678_RS27990	321.139	382.073	310.357	592.361	542.321	509.718	337.856	548.133	-0.698214	0.000935215	0.0148762	dbpA	NC_999999999.1	1064560	1065936	+	1377	protein_coding	ATP-dependent RNA helicase DbpA && PF00270:DEAD/DEAH box helicase|PF03880:DbpA RNA binding domain|PF00271:Helicase conserved C-terminal domain	DEAD
SBAL678_RS40195	164.51	225.771	365.599	127.848	124.066	118.437	251.96	123.45	1.02969	0.000938172	0.0148762	-	NC_999999999.1	3870809	3872047	-	1239	protein_coding	efflux RND transporter periplasmic adaptor subunit && PF16576:Barrel-sandwich domain of CusB or HlyD membrane-fusion|PF13533:Biotin-lipoyl like	-
SBAL678_RS23760	100.479	94.4329	119.523	57.5314	46.055	62.2892	104.812	55.2919	0.922819	0.000940219	0.0148762	-	NC_999999999.1	103882	104574	-	693	protein_coding	hypothetical protein && -	-
SBAL678_RS36525	2836.07	3179.24	3395.85	1614.08	2170.22	2010.8	3137.05	1931.7	0.699347	0.000951547	0.0149919	sdhC	NC_999999999.1	3067671	3068066	-	396	protein_coding	succinate dehydrogenase cytochrome b556 subunit && PF01127:Succinate dehydrogenase/Fumarate reductase transmembrane subunit	-
SBAL678_RS27125	1421.48	1386.1	1713.49	807.571	956.816	1022.07	1507.03	928.818	0.697927	0.000956871	0.0150089	-	NC_999999999.1	881092	881748	+	657	protein_coding	sel1 repeat family protein && PF08238:Sel1 repeat	-
SBAL678_RS33855	276.81	145.448	238.041	75.6432	105.269	135.983	220.1	105.632	1.05691	0.000960666	0.0150089	msrP	NC_999999999.1	2471907	2472941	+	1035	protein_coding	protein-methionine-sulfoxide reductase catalytic subunit MsrP && PF00174:Oxidoreductase molybdopterin binding domain	-
SBAL678_RS29190	196.033	171.499	231.01	122.521	102.449	117.56	199.514	114.176	0.806532	0.000980476	0.0152546	-	NC_999999999.1	1352741	1353346	+	606	protein_coding	sigma-70 family RNA polymerase sigma factor && PF04542:Sigma-70 region 2	Sigma70_r2
SBAL678_RS31455	2246	1166.84	1421.21	493.279	824.29	991.363	1611.35	769.644	1.06561	0.000989998	0.0152935	-	NC_999999999.1	1919249	1920970	+	1722	protein_coding	phospho-sugar mutase && PF02878:Phosphoglucomutase/phosphomannomutase, alpha/beta/alpha domain I|PF02879:Phosphoglucomutase/phosphomannomutase, alpha/beta/alpha domain II|PF02880:Phosphoglucomutase/phosphomannomutase, alpha/beta/alpha domain III|PF00408:Phosphoglucomutase/phosphomannomutase, C-terminal domain	PGM_PMM_II
SBAL678_RS45155	4.92545	5.42718	7.03074	33.0273	15.0384	16.6689	5.79445	21.5782	-1.88574	0.000991167	0.0152935	-	NC_999999999.1	5020091	5020375	+	285	protein_coding	DUF1145 domain-containing protein && PF06611:Protein of unknown function (DUF1145)	-
SBAL678_RS37175	19.7018	46.6737	36.1581	119.324	79.8913	53.516	34.1779	84.2439	-1.30172	0.00103533	0.0159092	-	NC_999999999.1	3212420	3212495	-	76	protein_coding	tRNA-Ala && -	-
SBAL678_RS45375	1731.79	1196.15	1525.67	687.181	927.679	963.289	1484.54	859.383	0.788353	0.00110677	0.0168923	-	NC_999999999.1	5073851	5074324	-	474	protein_coding	peroxiredoxin && PF08534:Redoxin	-
SBAL678_RS24675	360.543	212.745	347.52	148.09	137.225	198.273	306.936	161.196	0.928664	0.00110836	0.0168923	-	NC_999999999.1	288884	290842	+	1959	protein_coding	sigma-54-dependent Fis family transcriptional regulator && PF02954:Bacterial regulatory protein, Fis family|PF00158:Sigma-54 interaction domain|PF01590:GAF domain	Sigma54_activat
SBAL678_RS30765	584.158	674.055	542.372	1370.1	834.629	965.044	600.195	1056.59	-0.815666	0.00115627	0.0175509	-	NC_999999999.1	1749140	1757224	-	8085	protein_coding	type I polyketide synthase && PF00698:Acyl transferase domain|PF00109:Beta-ketoacyl synthase, N-terminal domain|PF00550:Phosphopantetheine attachment site|PF02801:Beta-ketoacyl synthase, C-terminal domain|PF16197:Ketoacyl-synthetase C-terminal extension|PF08659:KR domain|PF14765:Polyketide synthase dehydratase	ketoacyl-synt
SBAL678_RS41435	2922.76	3640.55	3285.37	1842.07	2090.33	2285.4	3282.89	2072.6	0.663315	0.0011775	0.0177982	-	NC_999999999.1	4133341	4134540	-	1200	protein_coding	NADH:ubiquinone reductase (Na(+)-transporting) subunit B && PF03116:NQR2, RnfD, RnfE family	-
SBAL678_RS36555	61.0755	196.464	102.448	287.657	275.39	250.034	119.996	271.027	-1.17772	0.0011867	0.0177982	-	NC_999999999.1	3078255	3078452	+	198	protein_coding	DUF2986 domain-containing protein && PF11661:Protein of unknown function (DUF2986)	-
SBAL678_RS29760	798.907	1572.8	860.764	241.845	437.052	697.463	1077.49	458.787	1.23067	0.00118687	0.0177982	-	NC_999999999.1	1489719	1491125	-	1407	protein_coding	FAD-dependent oxidoreductase && PF14691:Dihydroprymidine dehydrogenase domain II, 4Fe-4S cluster|PF07992:Pyridine nucleotide-disulphide oxidoreductase	Pyr_redox_2
SBAL678_RS37875	538.844	583.964	658.881	414.439	338.363	351.802	593.896	368.202	0.690431	0.0012031	0.0179009	-	NC_999999999.1	3388048	3388488	-	441	protein_coding	hypothetical protein && -	-
SBAL678_RS39860	25.6123	105.287	45.1976	154.483	139.105	147.388	58.6991	146.992	-1.32902	0.00120469	0.0179009	-	NC_999999999.1	3790848	3790939	-	92	protein_coding	tRNA-Ser && -	-
SBAL678_RS36390	33.493	73.8096	49.2152	118.259	130.646	85.0993	52.1726	111.335	-1.0965	0.0012081	0.0179009	-	NC_999999999.1	3034741	3035205	+	465	protein_coding	acyl-CoA thioesterase && PF03061:Thioesterase superfamily	4HBT
SBAL678_RS34965	13.7912	41.2465	20.0878	56.466	69.5524	56.148	25.0419	60.7221	-1.28744	0.0012218	0.0180324	-	NC_999999999.1	2685380	2685718	+	339	protein_coding	TusE/DsrC/DsvC family sulfur relay protein && PF04358:DsrC like protein	-
SBAL678_RS27590	949.626	588.306	1214.31	531.633	429.533	495.681	917.414	485.616	0.918201	0.00128291	0.0188251	-	NC_999999999.1	965381	965992	+	612	protein_coding	hypothetical protein && PF14163:Superinfection exclusion protein B	-
SBAL678_RS25340	63.0457	162.815	115.505	242.91	220.876	237.752	113.789	233.846	-1.04146	0.00128559	0.0188251	slmA	NC_999999999.1	437819	438412	-	594	protein_coding	nucleoid occlusion factor SlmA && PF00440:Bacterial regulatory proteins, tetR family	TetR_N
SBAL678_RS28085	2125.82	2391.21	2500.94	1486.23	1666.44	1306.32	2339.32	1486.33	0.654396	0.00129618	0.0189059	-	NC_999999999.1	1088839	1089252	-	414	protein_coding	DUF2170 family protein && PF09938:Uncharacterized protein conserved in bacteria (DUF2170)	-
SBAL678_RS41200	185.197	356.023	216.949	493.279	461.49	451.816	252.723	468.861	-0.892723	0.00133932	0.0194399	-	NC_999999999.1	4079001	4080191	-	1191	protein_coding	methyltransferase domain-containing protein && PF10672:S-adenosylmethionine-dependent methyltransferase	-
SBAL678_RS42520	248.242	182.353	262.146	113.997	126.886	150.898	230.914	130.594	0.821173	0.0013432	0.0194399	-	NC_999999999.1	4399307	4401073	-	1767	protein_coding	alkaline phosphatase D family protein && PF16655:PhoD-like phosphatase, N-terminal domain|PF09423:PhoD-like phosphatase	-
SBAL678_RS40685	238.392	490.617	377.651	858.71	776.355	540.424	368.887	725.163	-0.975385	0.00134911	0.01945	secG	NC_999999999.1	3985655	3985990	-	336	protein_coding	preprotein translocase subunit SecG && PF03840:Preprotein translocase SecG subunit	-
SBAL678_RS44500	132.002	173.67	159.698	466.644	280.089	202.659	155.123	316.464	-1.02741	0.00135532	0.0194645	-	NC_999999999.1	4871763	4873160	-	1398	protein_coding	hypothetical protein && -	-
SBAL678_RS37365	380.244	225.771	260.137	145.959	140.985	184.236	288.717	157.06	0.878003	0.00138779	0.0198545	lepB	NC_999999999.1	3262334	3262996	-	663	protein_coding	signal peptidase I && PF00717:Peptidase S24-like	Peptidase_S24
SBAL678_RS38970	744.727	521.009	728.184	320.684	393.817	445.675	664.64	386.725	0.780719	0.00142826	0.0203554	flgH	NC_999999999.1	3610452	3611126	-	675	protein_coding	flagellar basal body L-ring protein FlgH && PF02107:Flagellar L-ring protein	-
SBAL678_RS44020	86.6878	46.6737	59.2591	18.1117	18.798	41.2337	64.2069	26.0478	1.29295	0.00144257	0.0204697	-	NC_999999999.1	4753277	4754299	+	1023	protein_coding	zinc-binding alcohol dehydrogenase family protein && PF13602:Zinc-binding dehydrogenase	-
SBAL678_RS42165	24.6272	33.6485	20.0878	83.1009	46.9949	49.1295	26.1212	59.7418	-1.19209	0.00144724	0.0204697	rluA	NC_999999999.1	4321063	4321740	+	678	protein_coding	bifunctional tRNA pseudouridine(32) synthase/23S rRNA pseudouridine(746) synthase RluA && PF00849:RNA pseudouridylate synthase	-
SBAL678_RS35940	75.8519	39.0757	79.3469	17.0463	19.7378	40.3564	64.7582	25.7135	1.32416	0.00145284	0.0204714	-	NC_999999999.1	2916041	2916316	-	276	protein_coding	acylphosphatase && PF00708:Acylphosphatase	-
SBAL678_RS40690	1552.5	4265.76	2770.11	7327.8	6313.29	4640.1	2862.79	6093.73	-1.08996	0.00146822	0.0206103	-	NC_999999999.1	3985992	3986774	-	783	protein_coding	triose-phosphate isomerase && PF00121:Triosephosphate isomerase	-
SBAL678_RS26305	138.898	195.378	142.624	368.627	283.849	222.837	158.967	291.771	-0.875758	0.0014956	0.020916	-	NC_999999999.1	659418	660392	+	975	protein_coding	DMT family transporter && PF00892:EamA-like transporter family	DUF6
SBAL678_RS38815	188.152	96.6037	146.641	72.447	75.1918	75.4489	143.799	74.3625	0.952758	0.00151374	0.0210907	fliN	NC_999999999.1	3579564	3579944	-	381	protein_coding	flagellar motor switch protein FliN && PF01052:Type III flagellar switch regulator (C-ring) FliN C-term	-
SBAL678_RS38985	4230.96	3185.75	3671.05	1969.92	2060.26	2702.12	3695.92	2244.1	0.719685	0.00152644	0.0211886	flgE	NC_999999999.1	3612853	3614214	-	1362	protein_coding	flagellar hook protein FlgE && PF06429:Flagellar basal body rod FlgEFG protein C-terminal|PF07559:Flagellar basal body protein FlaE|PF00460:Flagella basal body rod protein	-
SBAL678_RS26220	18.7167	48.8446	30.1318	91.6241	62.0332	67.553	32.5643	73.7368	-1.1831	0.00155777	0.0215434	-	NC_999999999.1	641407	642150	-	744	protein_coding	sulfite exporter TauE/SafE family protein && PF01925:Sulfite exporter TauE/SafE	-
SBAL678_RS41755	1427.39	1166.84	1281.6	3143.99	2376.06	1573.02	1291.95	2364.36	-0.871602	0.00156841	0.0216105	-	NC_999999999.1	4223434	4225224	+	1791	protein_coding	flavocytochrome c && PF14537:Cytochrome c3|PF00890:FAD binding domain	-
SBAL678_RS43370	102.449	61.8698	78.3426	45.8121	23.4974	43.8656	80.8872	37.725	1.10428	0.00158638	0.0217777	-	NC_999999999.1	4594385	4595077	+	693	protein_coding	hypothetical protein && PF09694:Bacterial protein of unknown function (Gcw_chp)	-
SBAL678_RS34235	395.021	270.273	442.937	190.706	183.28	245.647	369.41	206.544	0.838407	0.00163525	0.0223663	-	NC_999999999.1	2536822	2538687	-	1866	protein_coding	M2 family metallopeptidase && PF01401:Angiotensin-converting enzyme	Peptidase_M2
SBAL678_RS34195	4.92545	6.51261	9.03953	44.7467	19.7378	11.4051	6.82586	25.2965	-1.87793	0.00171787	0.0234107	-	NC_999999999.1	2530752	2530836	-	85	protein_coding	tRNA-Tyr && -	-
SBAL678_RS28230	2567.14	1861.52	1786.81	606.211	859.066	1546.7	2071.83	1003.99	1.04469	0.001729	0.0234766	-	NC_999999999.1	1127002	1128528	-	1527	protein_coding	Re/Si-specific NAD(P)(+) transhydrogenase subunit alpha && PF01262:Alanine dehydrogenase/PNT, C-terminal domain|PF12769:4TM region of pyridine nucleotide transhydrogenase, mitoch|PF05222:Alanine dehydrogenase/PNT, N-terminal domain	-
SBAL678_RS28140	60.0904	28.2213	55.2415	18.1117	18.798	23.6874	47.8511	20.199	1.24359	0.00174025	0.0235438	-	NC_999999999.1	1104794	1106089	+	1296	protein_coding	porin && PF07396:Phosphate-selective porin O and P	-
SBAL678_RS30580	1154.52	777.172	1079.72	394.197	601.534	672.021	1003.81	555.917	0.851932	0.00175426	0.0236477	-	NC_999999999.1	1700822	1701490	-	669	protein_coding	thiol:disulfide oxidoreductase && PF00043:Glutathione S-transferase, C-terminal domain|PF02798:Glutathione S-transferase, N-terminal domain	GST_N
SBAL678_RS26000	650.159	397.269	694.035	306.834	371.26	295.654	580.488	324.583	0.839094	0.00176475	0.0237036	-	NC_999999999.1	581654	582202	+	549	protein_coding	prepilin-type N-terminal cleavage/methylation domain-containing protein && PF13544:Type IV pilin N-term methylation site GFxxxE	-
SBAL678_RS41895	317.199	143.277	262.146	154.483	96.8094	101.768	240.874	117.687	1.0367	0.00185446	0.0247587	-	NC_999999999.1	4258622	4260091	-	1470	protein_coding	sodium:proton antiporter && PF03600:Citrate transporter	-
SBAL678_RS30995	1311.15	846.64	1382.04	717.012	641.01	722.905	1179.95	693.642	0.766715	0.00185657	0.0247587	-	NC_999999999.1	1804424	1805314	-	891	protein_coding	GGDEF domain-containing protein && PF00990:Diguanylate cyclase, GGDEF domain	GGDEF
SBAL678_RS37565	971.298	759.805	930.067	471.971	547.96	629.033	887.056	549.655	0.690054	0.00188998	0.0251145	-	NC_999999999.1	3308446	3310692	-	2247	protein_coding	xanthine dehydrogenase family protein molybdopterin-binding subunit && PF02738:Molybdopterin-binding domain of aldehyde dehydrogenase	-
SBAL678_RS39640	121.166	159.559	128.562	74.5778	85.5307	74.5715	136.429	78.2267	0.800864	0.00193713	0.0256498	-	NC_999999999.1	3739642	3740025	+	384	protein_coding	endoribonuclease L-PSP && PF01042:Endoribonuclease L-PSP	Ribonuc_L-PSP
SBAL678_RS37245	31.5229	51.0155	40.1757	123.586	68.6125	68.4304	40.9047	86.8763	-1.0852	0.00195302	0.0257689	-	NC_999999999.1	3227336	3227833	-	498	protein_coding	DUF2919 domain-containing protein && PF11143:Protein of unknown function (DUF2919)	-
SBAL678_RS32030	403.887	596.989	367.607	686.115	848.728	815.9	456.161	783.581	-0.781401	0.00198066	0.0260415	-	NC_999999999.1	2050269	2050778	-	510	protein_coding	DUF2062 domain-containing protein && PF09835:Uncharacterized protein conserved in bacteria (DUF2062)	-
SBAL678_RS45410	576.277	242.052	451.976	199.229	235.914	214.064	423.435	216.403	0.968815	0.00199607	0.026152	-	NC_999999999.1	5079805	5080281	-	477	protein_coding	hypothetical protein && -	-
SBAL678_RS44650	9.85089	17.367	8.03513	36.2235	27.257	28.074	11.751	30.5182	-1.38293	0.00202586	0.0264495	-	NC_999999999.1	4904316	4904501	+	186	protein_coding	DUF2970 domain-containing protein && PF11174:Protein of unknown function (DUF2970)	-
SBAL678_RS27520	873.774	827.102	930.067	458.121	570.518	630.788	876.981	553.142	0.66419	0.00204677	0.0266294	-	NC_999999999.1	948189	949157	+	969	protein_coding	DUF2333 family protein && PF10095:Uncharacterized protein conserved in bacteria (DUF2333)	-
SBAL678_RS25490	171.406	227.941	188.826	341.992	275.39	357.066	196.058	324.816	-0.729252	0.00208787	0.0270687	-	NC_999999999.1	472141	472890	+	750	protein_coding	FtsQ-type POTRA domain-containing protein && PF03799:Cell division protein FtsQ|PF08478:POTRA domain, FtsQ-type	-
SBAL678_RS25060	414.723	501.471	398.743	760.693	631.611	679.04	438.312	690.448	-0.655696	0.00209503	0.0270687	-	NC_999999999.1	371147	375766	+	4620	protein_coding	S1 RNA-binding domain-containing protein && PF00575:S1 RNA binding domain	S1
SBAL678_RS41430	1813.55	2149.16	2004.77	1128.26	1314.92	1425.63	1989.16	1289.6	0.624888	0.00211814	0.0272729	-	NC_999999999.1	4132560	4133348	-	789	protein_coding	Na(+)-translocating NADH-quinone reductase subunit C && PF04205:FMN-binding domain	-
SBAL678_RS28630	57.1352	62.9552	64.2811	28.7657	31.0166	35.0925	61.4572	31.6249	0.954518	0.00214882	0.0275729	-	NC_999999999.1	1228557	1229867	+	1311	protein_coding	FtsX-like permease family protein && PF12704:MacB-like periplasmic core domain|PF02687:FtsX-like permease family	-
SBAL678_RS30425	313.258	314.776	354.55	173.66	188.919	238.629	327.528	200.403	0.707056	0.00218524	0.0279323	-	NC_999999999.1	1659843	1660775	+	933	protein_coding	flagellar motor protein MotB && PF13677:Membrane MotB of proton-channel complex MotA/MotB|PF00691:OmpA family	-
SBAL678_RS31835	1772.18	2200.18	1871.18	662.677	1157.01	1371.24	1947.84	1063.64	0.872308	0.00219179	0.0279323	-	NC_999999999.1	2012658	2013185	+	528	protein_coding	MotA/TolQ/ExbB proton channel family protein && PF01618:MotA/TolQ/ExbB proton channel family	-
SBAL678_RS33305	84.7177	141.107	100.439	203.491	196.439	175.462	108.754	191.797	-0.820172	0.00220035	0.027946	pabB	NC_999999999.1	2330171	2331583	-	1413	protein_coding	aminodeoxychorismate synthase component I && PF00425:chorismate binding enzyme|PF04715:Anthranilate synthase component I, N terminal region	-
SBAL678_RS44870	167.465	118.312	215.944	82.0355	99.6291	90.3632	167.241	90.676	0.883324	0.00220929	0.0279644	-	NC_999999999.1	4960256	4960504	+	249	protein_coding	hypothetical protein && -	-
SBAL678_RS24825	1686.47	1852.84	2328.18	1175.13	1367.55	1155.42	1955.83	1232.7	0.665947	0.00224195	0.0282605	-	NC_999999999.1	322049	323965	-	1917	protein_coding	methyl-accepting chemotaxis protein && PF00015:Methyl-accepting chemotaxis protein (MCP) signalling domain|PF00672:HAMP domain	HAMP
SBAL678_RS38980	1109.21	804.308	1160.07	598.753	591.196	700.973	1024.53	630.307	0.700806	0.00224782	0.0282605	flgF	NC_999999999.1	3611937	3612680	-	744	protein_coding	flagellar basal-body rod protein FlgF && PF06429:Flagellar basal body rod FlgEFG protein C-terminal|PF00460:Flagella basal body rod protein	-
SBAL678_RS27880	42.3588	71.6387	33.1449	112.932	92.11	90.3632	49.0475	98.4684	-1.00853	0.00231837	0.0290497	-	NC_999999999.1	1042699	1043613	-	915	protein_coding	tRNA glutamyl-Q(34) synthetase GluQRS && PF00749:tRNA synthetases class I (E and Q), catalytic domain	-
SBAL678_RS43500	889.535	510.155	962.207	399.524	500.026	413.214	787.299	437.588	0.847537	0.00233355	0.0290598	mscL	NC_999999999.1	4623807	4624217	+	411	protein_coding	large-conductance mechanosensitive channel protein MscL && PF01741:Large-conductance mechanosensitive channel, MscL	-
SBAL678_RS47045	32.5079	42.332	31.1361	91.6241	76.1317	50.0068	35.3254	72.5875	-1.03703	0.00234207	0.0290598	-	NC_999999999.1	4578801	4579091	-	291	protein_coding	hypothetical protein && -	-
SBAL678_RS46025	112.3	184.524	123.54	278.069	245.313	217.573	140.121	246.985	-0.818727	0.00234253	0.0290598	-	NC_999999999.1	5228384	5229427	-	1044	protein_coding	glycosyltransferase family 9 protein && PF01075:Glycosyltransferase family 9 (heptosyltransferase)	-
SBAL678_RS38965	750.638	484.104	673.947	391.001	358.101	407.073	636.23	385.391	0.723597	0.00238621	0.0295037	-	NC_999999999.1	3609349	3610440	-	1092	protein_coding	flagellar basal body P-ring protein FlgI && PF02119:Flagellar P-ring protein	-
SBAL678_RS43630	97.5238	45.5883	78.3426	40.4851	33.8363	31.5832	73.8182	35.3015	1.07066	0.00240259	0.0295278	nrfD	NC_999999999.1	4654885	4655832	-	948	protein_coding	polysulfide reductase NrfD && PF03916:Polysulphide reductase, NrfD	-
SBAL678_RS44330	324.094	454.797	290.269	742.582	639.13	488.663	356.387	623.458	-0.806903	0.00240398	0.0295278	-	NC_999999999.1	4832178	4833494	-	1317	protein_coding	HlyC/CorC family transporter && PF01595:Domain of unknown function DUF21|PF03471:Transporter associated domain	-
SBAL678_RS39635	169.435	107.458	164.72	96.9511	64.8529	78.0808	147.205	79.9616	0.884424	0.002458	0.0300923	-	NC_999999999.1	3738114	3739385	-	1272	protein_coding	membrane protein && -	-
SBAL678_RS26270	394.036	262.675	413.809	214.145	181.4	228.979	356.84	208.174	0.778026	0.0024706	0.0301478	-	NC_999999999.1	652613	653239	+	627	protein_coding	c-type cytochrome && PF00034:Cytochrome c	-
SBAL678_RS38855	1052.08	765.232	1248.46	631.78	612.813	614.996	1021.92	619.863	0.721559	0.00250595	0.0303811	fliF	NC_999999999.1	3587892	3589574	-	1683	protein_coding	flagellar basal body M-ring protein FliF && PF01514:Secretory protein of YscJ/FliF family|PF08345:Flagellar M-ring protein C-terminal	-
SBAL678_RS44680	136.927	108.544	144.632	66.0546	89.2903	64.0438	130.034	73.1296	0.830937	0.00250599	0.0303811	-	NC_999999999.1	4910769	4911284	-	516	protein_coding	pilus assembly protein PilP && PF04351:Pilus assembly protein, PilP	-
SBAL678_RS32625	83.7326	237.71	123.54	274.872	346.822	300.041	148.328	307.245	-1.05289	0.0025212	0.0304665	dsbB	NC_999999999.1	2176122	2176649	-	528	protein_coding	disulfide bond formation protein DsbB && PF02600:Disulfide bond formation protein DsbB	DsbB
SBAL678_RS41480	1722.92	1069.15	1387.06	393.131	673.907	1008.03	1393.05	691.69	1.00944	0.00254853	0.0306974	-	NC_999999999.1	4146613	4147911	-	1299	protein_coding	aminotransferase class I/II-fold pyridoxal phosphate-dependent enzyme && PF01053:Cys/Met metabolism PLP-dependent enzyme	Cys_Met_Meta_PP
SBAL678_RS34190	6.89562	48.8446	16.0703	93.7549	67.6726	50.0068	23.9368	70.4781	-1.56515	0.00257926	0.0309677	-	NC_999999999.1	2530583	2530667	-	85	protein_coding	tRNA-Tyr && -	-
SBAL678_RS32720	8586.04	7945.39	9755.66	4731.43	6738.13	4960.32	8762.36	5476.63	0.678016	0.00259254	0.0309689	-	NC_999999999.1	2197705	2198340	+	636	protein_coding	helix-turn-helix transcriptional regulator && PF00196:Bacterial regulatory proteins, luxR family	GerE
SBAL678_RS33630	1137.78	904.168	1038.54	567.856	657.928	738.697	1026.83	654.827	0.648637	0.00259594	0.0309689	-	NC_999999999.1	2404575	2406398	+	1824	protein_coding	AsmA family protein && PF05170:AsmA family	-
SBAL678_RS31235	132.002	51.0155	134.588	44.7467	50.7545	50.8841	105.869	48.7951	1.11848	0.0026251	0.0311853	-	NC_999999999.1	1865611	1866468	-	858	protein_coding	hypothetical protein && -	-
SBAL678_RS23630	367.438	187.78	293.282	131.044	151.324	178.094	282.834	153.487	0.881357	0.0026434	0.0311853	-	NC_999999999.1	66329	67252	-	924	protein_coding	pirin family protein && PF05726:Pirin C-terminal cupin domain|PF02678:Pirin	-
SBAL678_RS36815	1408.68	557.914	585.56	47.9429	111.848	300.041	850.717	153.277	2.47164	0.00264713	0.0311853	rmf	NC_999999999.1	3133614	3133790	-	177	protein_coding	ribosome modulation factor && PF04957:Ribosome modulation factor	-
SBAL678_RS31840	1173.24	1570.62	1321.78	542.287	835.569	962.412	1355.22	780.089	0.79606	0.00264749	0.0311853	-	NC_999999999.1	2013199	2013603	+	405	protein_coding	biopolymer transporter ExbD && PF02472:Biopolymer transport protein ExbD/TolR	-
SBAL678_RS37370	561.501	554.657	484.117	273.807	329.904	392.159	533.425	331.957	0.682962	0.00267967	0.0313864	-	NC_999999999.1	3263267	3265780	-	2514	protein_coding	FtsX-like permease family protein && PF02687:FtsX-like permease family	-
SBAL678_RS29490	135.942	126.996	134.588	88.4279	71.4322	77.2035	132.509	79.0212	0.748193	0.00268138	0.0313864	-	NC_999999999.1	1425463	1426368	+	906	protein_coding	ABC transporter permease subunit && PF00528:Binding-protein-dependent transport system inner membrane component	BPD_transp_1
SBAL678_RS27655	95.5536	160.644	130.571	253.564	218.056	201.782	128.923	224.467	-0.800767	0.00271828	0.0317189	-	NC_999999999.1	981494	982537	-	1044	protein_coding	methyltransferase && PF08468:Methyltransferase small domain N-terminal|PF05175:Methyltransferase small domain	-
SBAL678_RS28695	618.636	348.425	509.227	204.556	302.647	309.691	492.096	272.298	0.853052	0.00274477	0.0318302	-	NC_999999999.1	1241488	1242039	-	552	protein_coding	DUF924 domain-containing protein && PF06041:Bacterial protein of unknown function (DUF924)	-
SBAL678_RS31945	602.875	451.541	686	387.804	336.483	342.152	580.138	355.48	0.707475	0.00274487	0.0318302	-	NC_999999999.1	2034541	2035230	+	690	protein_coding	hypothetical protein && -	-
SBAL678_RS27545	127.076	155.217	138.606	379.281	217.116	192.131	140.3	262.843	-0.904144	0.00276479	0.0318713	cpdA	NC_999999999.1	952603	953442	+	840	protein_coding	3'%2C5'-cyclic-AMP phosphodiesterase && PF00149:Calcineurin-like phosphoesterase	Metallophos
SBAL678_RS39165	175.346	106.373	234.023	85.2317	104.329	74.5715	171.914	88.044	0.966992	0.00276548	0.0318713	-	NC_999999999.1	3644213	3647281	+	3069	protein_coding	efflux RND transporter permease subunit && PF00873:AcrB/AcrD/AcrF family	ACR_tran
SBAL678_RS42395	617.651	353.852	590.582	196.033	310.166	333.379	520.695	279.859	0.894864	0.00279365	0.0320969	-	NC_999999999.1	4367139	4367771	-	633	protein_coding	glutathione S-transferase family protein && PF02798:Glutathione S-transferase, N-terminal domain	GST_N
SBAL678_RS24795	651.144	436.345	507.218	231.191	348.702	344.784	531.569	308.226	0.78542	0.00281399	0.0322314	-	NC_999999999.1	317139	317534	+	396	protein_coding	hypothetical protein && -	-
SBAL678_RS39645	367.438	466.737	426.866	257.826	281.029	271.967	420.347	270.274	0.63643	0.00288201	0.0329017	-	NC_999999999.1	3740050	3741324	+	1275	protein_coding	serine dehydratase subunit alpha family protein && PF03313:Serine dehydratase alpha chain	-
SBAL678_RS46110	428.514	385.33	423.853	1186.85	726.541	472.871	412.566	795.421	-0.946268	0.00289013	0.0329017	hemN	NC_999999999.1	5246962	5248338	+	1377	protein_coding	oxygen-independent coproporphyrinogen III oxidase && PF04055:Radical SAM superfamily|PF06969:HemN C-terminal domain	Radical_SAM
SBAL678_RS38955	1158.46	879.203	1143	713.816	602.474	715.01	1060.22	677.1	0.647202	0.00290374	0.0329562	flgK	NC_999999999.1	3606223	3608148	-	1926	protein_coding	flagellar hook-associated protein FlgK && PF06429:Flagellar basal body rod FlgEFG protein C-terminal|PF00460:Flagella basal body rod protein	-
SBAL678_RS34945	1460.89	1186.38	1333.83	880.018	929.559	840.465	1327.03	883.347	0.587338	0.00292045	0.0330319	-	NC_999999999.1	2683616	2684275	+	660	protein_coding	Bax inhibitor-1/YccA family protein && PF01027:Inhibitor of apoptosis-promoting Bax1	-
SBAL678_RS42155	160.57	125.91	199.874	73.5124	108.088	89.4859	162.118	90.3621	0.842216	0.00292811	0.0330319	-	NC_999999999.1	4318365	4318739	-	375	protein_coding	PH domain-containing protein && PF08000:Bacterial PH domain	-
SBAL678_RS44375	741.772	803.222	858.755	413.374	435.173	623.769	801.25	490.772	0.706297	0.00294326	0.0331028	prpC	NC_999999999.1	4844080	4845219	+	1140	protein_coding	2-methylcitrate synthase && PF00285:Citrate synthase	Citrate_synt
SBAL678_RS27605	270.899	218.172	234.023	155.548	111.848	164.057	241.032	143.818	0.745519	0.00297844	0.0333979	modC	NC_999999999.1	968478	969563	-	1086	protein_coding	molybdenum ABC transporter ATP-binding protein ModC && PF00005:ABC transporter|PF03459:TOBE domain|PF07673:Protein of unknown function (DUF1602)	ABC_tran
SBAL678_RS42605	117.226	260.504	191.839	353.712	389.118	312.323	189.856	351.717	-0.890776	0.00302553	0.0338243	-	NC_999999999.1	4420458	4420703	+	246	protein_coding	DUF3297 family protein && PF11730:Protein of unknown function (DUF3297)	-
SBAL678_RS37635	2558.28	2237.08	2884.61	1809.04	1678.66	1589.69	2559.99	1692.46	0.597199	0.00307702	0.0342972	-	NC_999999999.1	3325831	3329280	-	3450	protein_coding	pilus assembly protein FimV && -	-
SBAL678_RS39795	408.812	371.219	500.187	234.387	303.587	257.053	426.739	265.009	0.687027	0.00314383	0.0349377	-	NC_999999999.1	3777497	3778132	-	636	protein_coding	YqiJ family protein && PF07290:Protein of unknown function (DUF1449)	-
SBAL678_RS27555	435.409	623.04	433.897	971.642	789.514	706.236	497.449	822.464	-0.725478	0.0032771	0.0363106	parE	NC_999999999.1	954101	955987	+	1887	protein_coding	DNA topoisomerase IV subunit B && PF01751:Toprim domain|PF02518:Histidine kinase-, DNA gyrase B-, and HSP90-like ATPase|PF00204:DNA gyrase B|PF00986:DNA gyrase B subunit, carboxyl terminus	DNA_gyraseB
SBAL678_RS35865	542.784	870.519	587.569	1198.57	1147.61	975.571	666.957	1107.25	-0.731597	0.0033089	0.0365546	hscA	NC_999999999.1	2899056	2900918	-	1863	protein_coding	Fe-S protein assembly chaperone HscA && PF00012:Hsp70 protein	HSP70
SBAL678_RS44430	1005.78	578.537	622.723	449.597	440.812	400.932	735.679	430.447	0.773776	0.00343232	0.0377391	-	NC_999999999.1	4859987	4860199	-	213	protein_coding	DUF1107 domain-containing protein && PF06526:Protein of unknown function (DUF1107)	-
SBAL678_RS40715	74.8668	158.474	106.466	188.575	249.073	193.886	113.269	210.511	-0.896789	0.00343634	0.0377391	yhbY	NC_999999999.1	3992434	3992733	+	300	protein_coding	ribosome assembly RNA-binding protein YhbY && PF01985:CRS1 / YhbY (CRM) domain	-
SBAL678_RS32840	104.419	62.9552	96.4216	49.0082	46.055	47.3749	87.9321	47.4794	0.891974	0.00345066	0.0377852	-	NC_999999999.1	2218847	2220046	+	1200	protein_coding	DUF4401 domain-containing protein && PF14351:Domain of unknown function (DUF4401)	-
SBAL678_RS24690	175.346	74.895	134.588	73.5124	56.3939	64.9211	128.276	64.9424	0.985383	0.00346549	0.0378367	-	NC_999999999.1	293501	294481	+	981	protein_coding	oxidoreductase && PF00107:Zinc-binding dehydrogenase	ADH_zinc_N
SBAL678_RS35895	161.555	213.831	171.751	324.946	281.969	269.335	182.379	292.083	-0.679677	0.00348061	0.0378909	cysE	NC_999999999.1	2904379	2905200	-	822	protein_coding	serine O-acetyltransferase && -	-
SBAL678_RS44010	1605.7	2514.95	1563.84	3105.63	3164.64	3051.29	1894.83	3107.19	-0.713711	0.00349489	0.0379152	rho	NC_999999999.1	4750895	4752160	+	1266	protein_coding	transcription termination factor Rho && PF07497:Rho termination factor, RNA-binding domain|PF00006:ATP synthase alpha/beta family, nucleotide-binding domain|PF07498:Rho termination factor, N-terminal domain	ATP-synt_ab
SBAL678_RS43635	62.0606	33.6485	53.2328	33.0273	16.9182	16.6689	49.6473	22.2048	1.17656	0.00350314	0.0379152	-	NC_999999999.1	4655835	4656542	-	708	protein_coding	4Fe-4S dicluster domain-containing protein && PF13247:4Fe-4S dicluster domain	-
SBAL678_RS39225	551.65	1084.35	629.754	1274.21	1331.83	1382.64	755.251	1329.56	-0.81643	0.00354181	0.0382229	-	NC_999999999.1	3666013	3667479	-	1467	protein_coding	ribosome biogenesis GTPase Der && PF14714:KH-domain-like of EngA bacterial GTPase enzymes, C-terminal|PF01926:50S ribosome-binding GTPase	-
SBAL678_RS31635	25.6123	106.373	48.2108	212.014	109.028	120.192	60.0653	147.078	-1.29438	0.00355634	0.0382691	-	NC_999999999.1	1965095	1965171	+	77	protein_coding	tRNA-Pro && -	-
SBAL678_RS26135	292.571	195.378	252.102	110.801	126.886	181.604	246.684	139.764	0.817753	0.00358027	0.0384159	-	NC_999999999.1	620780	621493	+	714	protein_coding	oxidative stress defense protein && PF04402:Protein of unknown function (DUF541)	-
SBAL678_RS45145	286.661	346.254	288.26	522.044	479.348	422.865	307.058	474.752	-0.628599	0.00374853	0.0400309	ftsY	NC_999999999.1	5017612	5019234	-	1623	protein_coding	signal recognition particle-docking protein FtsY && PF02881:SRP54-type protein, helical bundle domain|PF00448:SRP54-type protein, GTPase domain	-
SBAL678_RS32495	1.97018	9.76892	7.03074	18.1117	35.7161	11.4051	6.25661	21.7443	-1.80949	0.00375223	0.0400309	-	NC_999999999.1	2143635	2143710	+	76	protein_coding	tRNA-Lys && -	-
SBAL678_RS28680	1828.33	1223.29	1529.69	829.944	815.831	1140.51	1527.1	928.76	0.717236	0.00377732	0.0401838	-	NC_999999999.1	1239384	1239815	+	432	protein_coding	universal stress protein && PF00582:Universal stress protein family	Usp
SBAL678_RS26850	96.5387	55.3572	84.3689	22.3733	35.7161	53.516	78.7549	37.2018	1.07451	0.00380826	0.0403979	-	NC_999999999.1	825544	825930	+	387	protein_coding	4-carboxymuconolactone decarboxylase && PF02627:Carboxymuconolactone decarboxylase family	CMD
SBAL678_RS41420	716.16	991.002	756.307	400.589	458.67	621.137	821.156	493.465	0.733634	0.00384016	0.0406208	nqrE	NC_999999999.1	4131314	4131922	-	609	protein_coding	NADH:ubiquinone reductase (Na(+)-transporting) subunit E && PF02508:Rnf-Nqr subunit, membrane protein	-
SBAL678_RS38345	1353.51	771.744	1278.59	665.873	714.322	650.088	1134.62	676.761	0.745755	0.00386039	0.0407195	-	NC_999999999.1	3469601	3470065	-	465	protein_coding	hypothetical protein && -	-
SBAL678_RS26075	542.784	349.51	432.893	258.891	285.729	275.476	441.729	273.365	0.692602	0.00387664	0.0407757	-	NC_999999999.1	602937	603911	+	975	protein_coding	HlyD family secretion protein && PF13437:HlyD family secretion protein|PF13533:Biotin-lipoyl like	-
SBAL678_RS28995	17.7316	36.9048	17.0747	53.2698	47.9348	50.8841	23.9037	50.6962	-1.09254	0.00394659	0.0413948	-	NC_999999999.1	1306892	1307302	-	411	protein_coding	DUF3019 domain-containing protein && PF11456:Protein of unknown function (DUF3019)	-
SBAL678_RS38485	451.171	310.434	595.604	302.573	242.494	227.224	452.403	257.43	0.814837	0.0039968	0.0417534	-	NC_999999999.1	3508275	3509024	-	750	protein_coding	electron transfer flavoprotein subunit beta/FixA family protein && PF01012:Electron transfer flavoprotein domain	-
SBAL678_RS35920	152.689	260.504	143.628	290.853	325.205	361.453	185.607	325.837	-0.814015	0.00400314	0.0417534	-	NC_999999999.1	2909347	2910579	-	1233	protein_coding	lipoprotein-releasing ABC transporter permease subunit && PF02687:FtsX-like permease family|PF12704:MacB-like periplasmic core domain	-
SBAL678_RS32065	37.4334	97.6892	67.2942	122.521	142.864	128.965	67.4723	131.45	-0.966236	0.0040559	0.0420833	-	NC_999999999.1	2057820	2058176	-	357	protein_coding	glutaredoxin && PF13417:Glutathione S-transferase, N-terminal domain	-
SBAL678_RS45395	368.423	269.188	324.419	201.36	185.16	220.205	320.677	202.242	0.665294	0.00405731	0.0420833	-	NC_999999999.1	5076013	5076708	+	696	protein_coding	response regulator transcription factor && PF00072:Response regulator receiver domain|PF00486:Transcriptional regulatory protein, C terminal	Response_reg
SBAL678_RS35095	173.376	97.6892	57.2503	45.8121	43.2353	61.4119	109.438	50.1531	1.12447	0.00407608	0.0421609	-	NC_999999999.1	2708941	2709411	-	471	protein_coding	hypothetical protein && -	-
SBAL678_RS36300	874.759	442.858	878.843	347.319	442.692	434.27	732.153	408.094	0.8432	0.00420145	0.0431038	cspD	NC_999999999.1	3010222	3010428	+	207	protein_coding	cold shock domain-containing protein CspD && PF00313:'Cold-shock' DNA-binding domain	CSD
SBAL678_RS44200	580.217	573.11	558.442	352.646	349.642	432.515	570.59	378.268	0.592333	0.0042018	0.0431038	-	NC_999999999.1	4803534	4806182	+	2649	protein_coding	diguanylate cyclase && PF13185:GAF domain|PF00563:EAL domain|PF00990:Diguanylate cyclase, GGDEF domain	GGDEF
SBAL678_RS31255	103.434	40.1611	56.2459	31.9619	19.7378	36.8471	66.6138	29.5156	1.17634	0.00421329	0.0431038	-	NC_999999999.1	1869591	1870547	+	957	protein_coding	ABC transporter ATP-binding protein && PF00005:ABC transporter	ABC_tran
SBAL678_RS28665	63.0457	58.6135	107.47	41.5505	35.7161	40.3564	76.3764	39.2076	0.964016	0.00421528	0.0431038	-	NC_999999999.1	1236668	1237273	-	606	protein_coding	TetR/AcrR family transcriptional regulator && PF00440:Bacterial regulatory proteins, tetR family	TetR_N
SBAL678_RS33175	39.4036	28.2213	25.1098	10.654	13.1586	15.7916	30.9116	13.2014	1.22053	0.0042272	0.0431038	-	NC_999999999.1	2295998	2296216	+	219	protein_coding	DUF4266 domain-containing protein && PF14086:Domain of unknown function (DUF4266)	-
SBAL678_RS32270	181.256	372.304	259.133	495.409	516.944	420.233	270.898	477.529	-0.818714	0.0042365	0.0431038	rluC	NC_999999999.1	2101581	2102540	+	960	protein_coding	23S rRNA pseudouridine(955/2504/2580) synthase RluC && PF01479:S4 domain|PF00849:RNA pseudouridylate synthase	S4
SBAL678_RS34210	89.6431	136.765	132.58	381.412	250.013	123.701	119.663	251.709	-1.07156	0.00428051	0.0434333	-	NC_999999999.1	2531815	2532102	+	288	protein_coding	DUF406 family protein && PF04175:Protein of unknown function (DUF406)	-
SBAL678_RS30980	51.2246	80.3222	70.3074	115.063	111.848	120.192	67.2848	115.701	-0.784803	0.00432432	0.0437589	rnhB	NC_999999999.1	1798427	1799059	+	633	protein_coding	ribonuclease HII && PF01351:Ribonuclease HII	-
SBAL678_RS30975	143.823	220.343	157.689	252.499	272.57	357.066	173.952	294.045	-0.759685	0.00433641	0.0437626	lpxB	NC_999999999.1	1797249	1798427	+	1179	protein_coding	lipid-A-disaccharide synthase && PF02684:Lipid-A-disaccharide synthetase	-
SBAL678_RS25380	34.4781	71.6387	54.2372	117.194	85.5307	100.014	53.4513	100.913	-0.919282	0.00441348	0.0444203	rarD	NC_999999999.1	443792	444676	-	885	protein_coding	EamA family transporter RarD && PF00892:EamA-like transporter family	DUF6
SBAL678_RS43700	837.326	884.63	1009.41	642.434	532.922	640.438	910.456	605.265	0.589139	0.00445504	0.0446975	-	NC_999999999.1	4669062	4669457	-	396	protein_coding	VOC family protein && PF12681:Glyoxalase-like domain	-
SBAL678_RS44055	643.263	2732.04	1043.56	2648.58	3475.74	4062.83	1472.96	3395.72	-1.20525	0.00446496	0.0446975	dusB	NC_999999999.1	4760483	4761451	+	969	protein_coding	tRNA dihydrouridine synthase DusB && PF01207:Dihydrouridine synthase (Dus)	Dus
SBAL678_RS39045	7.88071	17.367	19.0834	68.1854	32.8964	20.1782	14.777	40.42	-1.44677	0.00448162	0.0447443	-	NC_999999999.1	3622389	3622464	+	76	protein_coding	tRNA-Arg && -	-
SBAL678_RS30210	1722.92	747.865	1282.61	405.916	417.315	951.884	1251.13	591.705	1.07983	0.00459944	0.0457981	-	NC_999999999.1	1599179	1600828	+	1650	protein_coding	malate synthase A && PF01274:Malate synthase	-
SBAL678_RS36255	726.996	994.259	748.272	1250.78	1389.17	1166.83	823.175	1268.92	-0.624613	0.00465753	0.0461991	metG	NC_999999999.1	3000724	3002793	+	2070	protein_coding	methionine--tRNA ligase && PF01588:Putative tRNA binding domain|PF09334:tRNA synthetases class I (M)	-
SBAL678_RS29675	577.262	692.508	568.486	1004.67	871.285	874.68	612.752	916.878	-0.581466	0.00466445	0.0461991	hemL	NC_999999999.1	1473713	1475005	-	1293	protein_coding	glutamate-1-semialdehyde 2%2C1-aminomutase && PF00202:Aminotransferase class-III	Aminotran_3
SBAL678_RS45045	4993.42	2976.26	3526.42	1373.3	2406.14	2600.35	3832.03	2126.6	0.849407	0.00468888	0.0463182	-	NC_999999999.1	4998028	4998375	+	348	protein_coding	hypothetical protein && -	-
SBAL678_RS36490	1581.07	1694.36	1152.04	2819.04	1889.19	2495.95	1475.82	2401.4	-0.702344	0.00486868	0.0479674	sucD	NC_999999999.1	3058432	3059304	-	873	protein_coding	succinate--CoA ligase subunit alpha && PF00549:CoA-ligase|PF02629:CoA binding domain	CoA_binding
SBAL678_RS31300	19.7018	64.0407	32.1405	87.3625	78.9514	78.9581	38.6277	81.7573	-1.08788	0.00490459	0.0481941	-	NC_999999999.1	1879781	1880329	-	549	protein_coding	DUF1415 domain-containing protein && PF07209:Protein of unknown function (DUF1415)	-
SBAL678_RS29395	314.243	324.545	362.585	572.118	533.862	430.76	333.791	512.247	-0.617171	0.00496028	0.0484869	-	NC_999999999.1	1403056	1404354	+	1299	protein_coding	sugar MFS transporter && PF07690:Major Facilitator Superfamily	MFS_1
SBAL678_RS36290	10285.3	5959.04	7687.61	3977.13	4927.88	5518.29	7977.32	4807.77	0.730506	0.00498232	0.0484869	clpA	NC_999999999.1	3007408	3009675	-	2268	protein_coding	ATP-dependent Clp protease ATP-binding subunit ClpA && PF10431:C-terminal, D2-small domain, of ClpB protein|PF00004:ATPase family associated with various cellular activities (AAA)|PF07724:AAA domain (Cdc48 subfamily)|PF02861:Clp amino terminal domain, pathogenicity island component	Clp_N
SBAL678_RS32675	84.7177	103.116	92.404	171.529	136.285	147.388	93.4127	151.734	-0.699624	0.00499067	0.0484869	hda	NC_999999999.1	2188448	2189158	+	711	protein_coding	DnaA inactivator Hda && PF00308:Bacterial dnaA protein	-
SBAL678_RS33020	188.152	283.299	225.988	348.385	372.199	382.508	232.48	367.697	-0.662794	0.00499156	0.0484869	tsaB	NC_999999999.1	2263242	2263955	+	714	protein_coding	tRNA (adenosine(37)-N6)-threonylcarbamoyltransferase complex dimerization subunit type 1 TsaB && PF00814:Glycoprotease family	Peptidase_M22
SBAL678_RS36650	94.5686	97.6892	87.3821	178.987	158.843	124.578	93.2133	154.136	-0.723754	0.00500549	0.0484869	-	NC_999999999.1	3095999	3098233	+	2235	protein_coding	diguanylate cyclase && PF00990:Diguanylate cyclase, GGDEF domain	GGDEF
SBAL678_RS24725	554.605	204.062	426.866	148.09	280.089	130.72	395.178	186.3	1.08525	0.00501231	0.0484869	-	NC_999999999.1	300832	301356	+	525	protein_coding	Spy/CpxP family protein refolding chaperone && PF07813:LTXXQ motif family protein	-
SBAL678_RS35795	56.1501	108.544	45.1976	154.483	121.247	129.842	69.9637	135.191	-0.953231	0.00504239	0.0486519	-	NC_999999999.1	2883504	2884160	+	657	protein_coding	glutathione S-transferase && PF13410:Glutathione S-transferase, C-terminal domain|PF13417:Glutathione S-transferase, N-terminal domain	-
SBAL678_RS26205	152.689	78.1513	139.61	59.6622	64.8529	76.3262	123.484	66.9471	0.883014	0.00509085	0.0489929	phsA	NC_999999999.1	637490	639772	+	2283	protein_coding	thiosulfate reductase PhsA && PF00384:Molybdopterin oxidoreductase|PF01568:Molydopterin dinucleotide binding domain|PF04879:Molybdopterin oxidoreductase Fe4S4 domain	-
SBAL678_RS41915	258.093	459.139	339.484	672.265	540.441	550.075	352.239	587.594	-0.7387	0.00512201	0.049063	epd	NC_999999999.1	4263909	4264925	-	1017	protein_coding	erythrose-4-phosphate dehydrogenase && PF00044:Glyceraldehyde 3-phosphate dehydrogenase, NAD binding domain|PF02800:Glyceraldehyde 3-phosphate dehydrogenase, C-terminal domain	-
SBAL678_RS39970	1661.85	2792.83	1850.09	3547.77	3578.19	3111.83	2101.59	3412.6	-0.699514	0.00515712	0.049063	-	NC_999999999.1	3809050	3810687	-	1638	protein_coding	CTP synthase && PF06418:CTP synthase N-terminus|PF00117:Glutamine amidotransferase class-I	CTP_synth_N
SBAL678_RS31105	69.9413	95.5183	132.58	55.4006	46.9949	58.7799	99.3464	53.7251	0.886424	0.00516633	0.049063	-	NC_999999999.1	1832377	1832667	+	291	protein_coding	hypothetical protein && -	-
SBAL678_RS36055	339.856	339.741	400.752	107.605	168.242	289.513	360.116	188.453	0.931575	0.00517072	0.049063	-	NC_999999999.1	2950862	2952022	+	1161	protein_coding	histidinol-phosphate transaminase && PF00155:Aminotransferase class I and II	Aminotran_1_2
SBAL678_RS43750	228.541	179.097	219.962	123.586	118.427	150.02	209.2	130.678	0.678254	0.00517104	0.049063	-	NC_999999999.1	4679555	4681063	+	1509	protein_coding	DUF853 family protein && PF05872:Bacterial protein of unknown function (DUF853)	-
SBAL678_RS42245	419.648	385.33	364.594	243.976	296.068	213.187	389.857	251.077	0.635204	0.00517826	0.049063	-	NC_999999999.1	4337288	4337608	+	321	protein_coding	hypothetical protein && -	-
SBAL678_RS24625	346.751	249.65	207.909	98.0165	125.006	205.291	268.104	142.771	0.906455	0.00519011	0.049063	-	NC_999999999.1	281047	281706	-	660	protein_coding	response regulator transcription factor && PF00486:Transcriptional regulatory protein, C terminal|PF00072:Response regulator receiver domain	Trans_reg_C
SBAL678_RS43490	226.57	277.871	246.076	693.573	375.019	310.569	250.173	459.72	-0.876865	0.00524734	0.0494126	-	NC_999999999.1	4621492	4622550	-	1059	protein_coding	HlyD family secretion protein && PF16576:Barrel-sandwich domain of CusB or HlyD membrane-fusion|PF00529:HlyD membrane-fusion protein of T1SS	HlyD
SBAL678_RS37435	91.6133	132.423	91.3996	148.09	179.52	202.659	105.145	176.757	-0.752932	0.00525357	0.0494126	scpB	NC_999999999.1	3280343	3280939	-	597	protein_coding	SMC-Scp complex subunit ScpB && PF04079:Putative transcriptional regulators (Ypuh-like)	DUF387
